1  
2  
3  
4  
5  
6  
7  
8  
9  
10  
11  
12  
13  
14  
15  
16  
17  
18  
19  
20  
21  
22  
23  
24  
25  
26  
27  
28  
29  
30  
31  
32

# European Vintage tomatoes galore: a result of farmers combinatorial assorting/swapping of a few diversity rich loci

Running title: Vintage European tomatoes diversification

Jose Blanca<sup>1</sup>, Clara Pons<sup>1,2</sup>, Javier Montero-Pau<sup>1</sup>, David Sanchez-Matarredona<sup>1</sup>, Peio Ziarsolo<sup>1</sup>, Lilian Fontanet<sup>3</sup>, Josef Fisher<sup>4</sup>, Mariola Plazas<sup>1</sup>, Joan Casals<sup>5</sup>, Jose Luis Rambla<sup>2</sup>, Alessandro Riccini<sup>6</sup>, Samuela Pombarelli<sup>7</sup>, Alessandra Ruggiero<sup>7</sup> Maria Sulli<sup>8</sup>, Stephania Grillo<sup>7</sup>, Angelos Kanellis<sup>9</sup>, Giovanni Giuliano<sup>8</sup>, Richard Finkers<sup>10</sup>, Maria Cammareri<sup>7</sup>, Silvana Grandillo<sup>7</sup>, Andrea Mazzucato<sup>6</sup>, Mathilde Causse<sup>3</sup>, Maria José Díez<sup>1</sup>, Jaime Prohens<sup>1</sup>, Dani Zamir<sup>4</sup>, Joaquin Cañizares<sup>1</sup>, Antonio Jose Monforte<sup>2 (\*)</sup>, Antonio Granell<sup>2 (\*)</sup>

<sup>1</sup> Instituto de Conservación y Mejora de la Agrodiversidad Valenciana (COMAV-UPV), Universitat Politècnica de València, València, Spain

J. Blanca: [jblanca@btc.upv.es](mailto:jblanca@btc.upv.es)

Clara Pons [cpons@upvnet.upv.es](mailto:cpons@upvnet.upv.es)

J. Montero-Pau: [javier.montero@uv.es](mailto:javier.montero@uv.es).

D Sanchez-Matarredona: [david.sanchez.matarredona@gmail.com](mailto:david.sanchez.matarredona@gmail.com)

P. Ziarsolo: [pziarsolo@gmail.com](mailto:pziarsolo@gmail.com)

M. Plazas: [maplav@btc.upv.es](mailto:maplav@btc.upv.es)

M.J. Díez: [mdiezni@btc.upv.es](mailto:mdiezni@btc.upv.es)

J. Prohens: [jprohens@btc.upv.es](mailto:jprohens@btc.upv.es)

J. Cañizares: [jcanizares@upv.es](mailto:jcanizares@upv.es)

<sup>2</sup> Instituto de Biología Molecular y Celular de Plantas (IBMCP). Consejo Superior de Investigaciones Científicas (CSIC), Universitat Politècnica de València, València, Spain

Clara Pons [cpons@upvnet.upv.es](mailto:cpons@upvnet.upv.es)

Jose Luis Rambla: [jlrambla@ibmcp.upv.es](mailto:jlrambla@ibmcp.upv.es)

Antonio Jose Monforte: [amonforte@ibmcp.upv.es](mailto:amonforte@ibmcp.upv.es)

Antonio Granell: [agranel@ibmcp.upv.es](mailto:agranel@ibmcp.upv.es)

33

34 <sup>3</sup> INRAE, UR1052, Génétique et Amélioration des Fruits et Légumes, 67 Allée des Chênes,  
35 Centre de Recherche PACA, Domaine Saint Maurice, CS60094, Montfavet, 84143, France

36 Mathilde Causse: mathilde.causse@inrae.fr

37 Lilian Fontanet: Lilian.fontanet@hmclause.com

38

39

40

41 <sup>4</sup> Hebrew Univ Jerusalem, Robert H Smith Inst Plant Sci & Genet Agr, Rehovot, Israel

42 Joseph Fisher. Josef.fisher@mail.huji.ac.il

43 Dani Zamir. dani.zamir@mail.huji.ac.il

44

45 <sup>5</sup> Department of Agri-Food Engineering and Biotechnology/Miquel Agustí Foundation, UPC-  
46 BarcelonaTech, Campus Baix Llobregat, Esteve Terrades, 8, 08860 Castelldefels, Spain

47 Joan Casals: joan.casals-missio@upc.edu

48

49 <sup>6</sup> Department of Agriculture and Forest Sciences (DAFNE), Università degli Studi della Tuscia,  
50 Viterbo, Italy

51 Andrea Mazzucato: mazz@unitus.it

52 Alessandro Riccini: alessandroriccini@gmail.com

53

54 <sup>7</sup> Institute of Biosciences and BioResources (IBBR), National Research Council of Italy (CNR),  
55 Via Università 133, 80055 Portici, Italy

56 Silvana Grandillo: silvana.grandillo@cnr.it

57 Samuela Pombarelli: palombieri@unitus.it

58 Stephania Grillo: grillo@unina.it

59 Maria Cammareri: maria.cammareri@cnr.it

60 Alessandra Ruggiero: alessandra.ruggiero@ibbr.cnr.it

61

62 <sup>8</sup>Italian National Agency for New Technologies, Energy and Sustainable Economic Development  
63 (ENEA), Casaccia Research Centre, Rome, Italy

64 Maria Sulli: maria.sulli@enea.it

65 Giovanni Giuliano: giovanni.giuliano@enea.it

66

67 <sup>9</sup> Group of Biotechnology of Pharmaceutical Plants, Laboratory of Pharmacognosy, Department  
68 of Pharmaceutical Sciences, Aristotle University of Thessaloniki, 54124 Thessaloniki, Greece  
69 Angelos K. Kanellis: [kanellis@pharm.auth.gr](mailto:kanellis@pharm.auth.gr)

70

71 <sup>10</sup> Wageningen Univ & Res, Plant Breeding, POB 386, NL-6700 AJ Wageningen, Netherlands  
72 Richard Finkers: [richard.finkers@wur.nl](mailto:richard.finkers@wur.nl)

73

74 J. M.-G. Current address: Cavanilles Institute of Biodiversity and Evolutionary Biology (ICBiBE),  
75 Universitat de València, 46022, Valencia, Spain

76

77 L. M. Current address: HM Clause, Portes-lès-Valence, France,

78

79 (\*) Corresponding authors

80 Antonio Jose Monforte, [amonforte@ibmcp.upv.es](mailto:amonforte@ibmcp.upv.es)

81 Antonio Granell, [agranell@ibmcp.upv.es](mailto:agranell@ibmcp.upv.es)

82

83

84

85 Date of submission: July 8<sup>th</sup> 2021

86 Five figures, eight Supplementary figures, three Supplementary tables.

87 Word count: 6,896

88

## 89 Highlight

90 The high phenotypic diversity observed among European vintage varieties was created by  
91 traditional farmers by combining very few polymorphic loci subjected to balancing selection.  
92

## 93 Abstract

94 A comprehensive collection of 1,254 tomato accessions corresponding to European heirlooms  
95 and landraces, together with modern varieties, early domesticates and wild relatives, were  
96 analyzed by genotyping by sequencing. A continuous genetic gradient between the vintage and  
97 modern varieties was observed. European vintage tomatoes displayed very low genetic diversity,  
98 with only 298 loci out of 64,943 variants being polymorphic at the 95% threshold. European  
99 vintage tomatoes could be classified in several genetic groups. Two main clusters consisting of  
100 Spanish and Italian accessions showed a higher genetic diversity than the rest varieties,  
101 suggesting that these regions might be independent secondary centers of diversity and with a  
102 different history. Other varieties seem to be the result of a more recent complex pattern of  
103 migrations and hybridizations among the European regions. Several polymorphic loci were  
104 associated in a GWAS with fruit morphological traits in the European vintage collection, and the  
105 corresponding alleles were found to contribute to the distinctive phenotypic characteristic of the  
106 genetic varietal groups. The few highly polymorphic loci associated with morphological traits in an  
107 otherwise diversity-poor genome suggests a history of balancing selection, in which tomato  
108 farmers maintained the morphological variation by applying a high selective pressure within  
109 different varietal types.

110  
111 Keywords: Crop evolution, diversification, selection, genotyping by sequencing, GWAS, SNP, fruit  
112 morphology

113  
114 Abbreviations

115  
116 GBS: Genotyping by Sequencing  
117 GWAS: Genome-Wide Association Analysis  
118 LD: Linkage Disequilibrium  
119 LSL: Long Shelf-Life

- 120 MAF: Minimum Allele Frequency  
121 PcoA: Principal Coordinate Analyses  
122 QTL: Quantitative Trait Locus  
123 SLL: *Solanum lycopersicum* L. var. *lycopersicum*  
124 SLC: *S. lycopersicum* var. *cerasiforme*  
125 SNP: Single Nucleotide Polymorphism  
126 SP: *S. pimpinellifolium*

## 127 Introduction

128 The widespread tomato crop (*Solanum lycopersicum* L. var. *lycopersicum*; SLL) originated in  
129 Mesoamerica in a region corresponding to today's Mexico as a result of the *S. lycopersicum* L.  
130 var. *cerasiforme* (SLC) (Blanca *et al.*, 2012; Blanca *et al.*, 2015; Razifard *et al.*, 2020). Tomato  
131 was later brought to Europe, and the Italian botanist Mattioli in 1544 already described varieties  
132 with flat, round and segmented fruit types (McCue 1952). This indicated that tomato had probably  
133 arrived to Europe in different shapes from America (Luckwill, 1943; Sanfuentes-Echevarria 2006;  
134 Sahagún 1577). Tomato was not immediately adopted for consumption by Europeans, as it was  
135 considered at different times and regions as: poisonous, aphrodisiac, ornamental, valuable for  
136 sauces and soups, miracle cure and, finally, a fresh salad ingredient (Harvey 2004). It was only  
137 as late as the mid-19th century that the tomato became a regular component of the diet in Britain  
138 and North America (Harvey 2004). On the contrary, the tomato was better received, extensively  
139 cultivated, and consumed as food by the 18th century in Southern Europe, which therefore could  
140 have become a secondary center of diversity (Boswell 1937; Bauchet and Causse 2012). As a  
141 result of this long tradition of use a large number of traditional varieties are currently available  
142 along the Mediterranean basin showing an impressive phenotypic diversity in terms of fruit  
143 appearance, adaptation to local conditions and culinary use. Despite the interest for unveiling the  
144 population history and the processes that gave rise to the domestication of tomato (Blanca *et al.*,  
145 2015; Razifard *et al.*, 2020), there are yet no detailed genetic analyses of the diversification history  
146 of the European traditional tomato varieties.

147  
148 The extent and type of the molecular variation in the tomato clade has been extensively analyzed  
149 in previous studies. The first molecular studies, carried out with isoenzymes, determined that the  
150 worldwide cultivated SLL was less variable than the wild *S. pimpinellifolium* (SP) and that the wild,  
151 feral and semi-domesticated *S. lycopersicum* var. *cerasiforme* (SLC) was genetically closer to

152 SLL than to SP (Rick *et al.*, 1974; Rick and Fobes 1975). A clear trend of diversity reduction was  
153 already observed at the species/subspecies level, probably due to bottlenecks associated with  
154 migrations and to the selection pressure imposed by humans during the early domestication  
155 stages and development of cultivars from SP to SLC, and lastly, to SLL, (Blanca *et al.*, 2012,  
156 2015, Razifard *et al.*, 2020).

157  
158 Despite this limited SLL diversity, several molecular studies have unveiled the worldwide genetic  
159 structure within SLL, dividing it into four major groups: processing and fresh market, cherry and  
160 vintage tomatoes (Williams and St. Clair 1993; Robbins *et al.*, 2011; Sim *et al.*, 2011; Casals *et*  
161 *al.*, 2019). The first three groups correspond to modern tomato varieties created by breeders in  
162 the 20th century, characterized by their different culinary use and the introgression of wild species  
163 genes, mainly to increase disease resistance and also to develop new type of cultivars. Vintage  
164 cultivars are defined as those developed by traditional farmers by intuitive breeding and were  
165 cultivated (and some of them are still nowadays locally) before the advent of professional  
166 breeding. In this study, landraces, traditional and heirlooms are considered as synonymous of  
167 vintage. Park *et al.*, (2004) found genetic differentiation between vintage and modern cultivars. A  
168 more comprehensive analysis using 7,720 SolCAP single nucleotide polymorphisms (SNP) from  
169 over 426 accessions confirmed the previously described fresh, processing, and vintage groups,  
170 at the same time finding two extra clusters located between SLL and SP that corresponded to  
171 cultivated and wild cherry tomatoes (Sim *et al.*, 2012). Blanca *et al.*, (2012; 2015) also obtained  
172 the fresh, processing, and vintage split and clarified the status of the cherry tomatoes: some of  
173 them were SLC from South America, Mesoamerica, and the subtropical regions, while others  
174 were modern cherry tomatoes obtained by hybridizing cultivated SLL with wild SP. Blanca *et al.*,  
175 (2015), compared with a rarefaction analysis the genetic diversities of the different groups and  
176 found that vintage SLL and SLC from outside Peru and Ecuador had the lowest diversity, whereas  
177 Peruvian and Ecuadorian SP and SLC had much higher diversities.

178  
179 The studies mentioned above differentiated the modern varieties from the vintage ones, but none  
180 of them found any structure within the vintage tomato group. García-Martínez *et al.*, (2006)  
181 studied a collection of vintage Spanish cultivars belonging to the varietal groups “Muchamiel”,  
182 “Pera”, and “Moruno” with 19 microsatellite and amplified fragment length polymorphism markers  
183 and managed to differentiate the “Pera” type from the other two groups. Mazzucato *et al.*, (2008)  
184 dissected a collection of 36 Italian vintage accessions by using 29 microsatellites, and Sacco *et*  
185 *al.*, (2015) found differences between 61 Italian vintage varieties and 26 American ones. Current

186 genomic sequencing technologies allow finding variable molecular markers even in very narrow  
187 genetic contexts. Thus, recently, Esposito *et al.*, (2020), using double digest restriction-site  
188 associated DNA sequencing (ddRAD-seq), was able to obtain a sufficient number of SNPs to  
189 study the differentiation of a special type of vintage tomatoes cultivated in Spain and Italy, called  
190 “de penjar” or “da serbo”, characterized by their long shelf-life (LSL). Overall, “de penjar/da serbo”  
191 varieties tended to cluster together, showing certain genetic differentiations when compared with  
192 other vintage and modern cultivars, but some level of admixture was also found. These former  
193 studies were focused on a limited number of accessions from a narrow local diversity and  
194 therefore a broader view is clearly needed to better understand the history and relationships of  
195 the European vintage varieties.

196  
197 In the present study, the genomes of 1,254 European tomato accessions collected from Southern  
198 European seed banks were partially sequenced by Genotyping by Sequencing (GBS, Elshire *et*  
199 *al.*, 2011; Baird *et al.*, 2008) to obtain genotypes for unbiased markers. Based on these, the  
200 genetic structure, diversity, and the association between the polymorphic loci with the  
201 morphological variation in that collection were analyzed to shed light on the history of the making  
202 up of the diverse vintage European tomatoes.

## 203 Material and methods

### 204 Materials

205 A total of 1,254 tomato accessions were analyzed in this study. One thousand forty four of these  
206 accessions are part of the collection of the EU TRADITOM project ([www.traditom.eu](http://www.traditom.eu)). Seeds  
207 composing the TRADITOM collection were obtained from the genebanks of the Institute for the  
208 Conservation and Improvement of Valencian Agrodiversity at the Polytechnic University of  
209 Valencia (COMAV-UPV, Valencia, Spain), of the Balearic Island University (UIB, Mallorca, Spain),  
210 the Station d'Amelioration des Plantes Maraicheres of the French National Institute for  
211 Agricultural Research, (INRA, Montfavet, France), of the Department of Agriculture and Forest  
212 Sciences of the University of Tuscia (UNITUS, Viterbo, Italy), of Institute of Biosciences and  
213 Bioresources of the Italian National Council of Research (CNR-IBBR, Portici, Italy), of of the  
214 Agricultural Research Center of Macedonia and Thrace of the National Agricultural Research  
215 Foundation (GGB-NAGREF, Thessaloniki, Greece) and the seed collections of the Miquel Agustí

216 Foundation of the Polytechnic University of Catalunya (FMA-UPC, Casteldefels, Spain), of  
217 BioEconomy of the Italian National Council of Research (CNR-IBE, Catania, Italy), of ARCA 2010  
218 S.C.ar.I. (ARCA, Acerra, Italy), of the University of Reggio Calabria (UNIRC, Reggio Calabria,  
219 Italy), of the Robert H. Smith Faculty of Agriculture, Food and Environment of the Hebrew  
220 University of Jerusalem (HUJI-ARO, Rehovot, Israel). An additional set of 110 accessions were  
221 obtained from the COMAV genebank (<http://www.upv.es/contenidos/BGCOMAV/indexi.html>) that  
222 contained 10 wild accessions from the Galapagos Islands, one accession of each wild species *S.*  
223 *habrochaites*, *S. chmielewskii* and *S. peruvianum*, 36 *S. pimpinellifolium* accessions from Peru  
224 (SP) and North Ecuador (SP\_NECu) and 52 *S. lycopersicum* var. *cerasiforme* (SLC) accessions,  
225 three modern and 20 SPxSL (*S. pimpinellifolium* x *S. lycopersicum* hybrids, corresponding to  
226 cherry cultivars and other crosses between the two species). Passport data can be found in  
227 Supplementary Table S1. The germplasm collection was extensively phenotyped in the  
228 TRADITOM project (Pons *et al.*, 2017, and in preparation). The dataset corresponding to fruit  
229 morphology and color traits obtained at the HUJI-ARO trial was used and analyzed for this article  
230 (Supplementary Table S2).

## 231 DNA extraction, library preparation and sequencing

232 Genomic DNA was isolated from young leaves of 5-10 seedlings per accession, using the DNeasy  
233 96 Plant Mini Kit (Qiagen, Germany). Genotype-By-Sequencing (GBS) was performed following  
234 the procedure reported by Elshire (2011). Briefly, DNA was digested with the restriction enzyme  
235 *ApeK* I, barcoded libraries were prepared to track each accession and the DNA sequence  
236 corresponding to the region flanking the *ApeK* I site was obtained on an Illumina HiSeq 2000  
237 platform by LGC Genomics GmbH (Berlin, Germany). Following the Variant Call Format standard,  
238 we used the term sample to refer to one genotyping experiment from one accession.

239

## 240 Read mapping, SNP calling and SNP filtering

241 FastQC was used to evaluate the quality of the sequenced reads, and these were mapped against  
242 the *S. lycopersicum* genome build 2.5 (Sato *et al.*, 2012) using BWA mem (Li 2013). After  
243 mapping, the PHRED quality of 3 aligned nucleotides from each read end was set to 0 in order to  
244 avoid possible false positives caused by misalignments (Li 2011). Mapping statistics were  
245 calculated with the samtools stats command (Li *et al.*, 2009).

246



247 SNP calling was carried out by freebayes (Garrison and Marth 2012) with the following  
248 parameters: a minimum mapping quality of 57, 5 best alleles, 20 minimum base quality, 0.05  
249 maximum mismatch read alignment rate, 10 minimum coverage, 2 minimum alternate allele  
250 count, and 0.2 minimum alternate fraction. To avoid regions in the reference genome with  
251 potential assembly problems, the Heinz 1706 reads used to build the reference genome were  
252 mapped against the reference assembly version SL2.50, a 50X mean coverage was obtained,  
253 and when any region had a coverage higher than 200X was removed from the SNP calling.

254  
255 SNP and genotype processing were carried out by using the variation Python library located at  
256 <https://github.com/JoseBlanca/variation>. To create the tier1 SNP set to be used in the rest of the  
257 analyses, the genotypes with a quality lower than 5 were set to missing, and the variants with a  
258 SNP quality lower than 50, an observed heterozygosity higher than 0.1, and a call rate lower than  
259 0.6 were filtered out. Moreover, in order to avoid false positives, only variants in which the minor  
260 allele was found in more than 2 samples were kept. This filtering was carried out with the  
261 “create\_tier1.py” script. For some analyses, the pericentromeric regions, that seldom recombine,  
262 were removed as part of the heterochromatin. To locate the pericentromeric regions a piecewise  
263 regression analysis was applied to the relationship between the genetic distance and the physical  
264 positions of the markers of the EXPIM map (Sim *et al.*, 2012). Regression analyses were done  
265 using the segmented R library (Muggeo 2003). The calculated pericentromeric regions were:  
266 chromosome 1, from 5488553 to 74024603, chromosome 2, from 0 to 30493730, chromosome  
267 3, from 16493431 to 50407653, chromosome 4, from 7406888 to 50551374, chromosome 5, from  
268 9881466 to 58473554, chromosome 6, from 3861081 to 33077717, chromosome 7, from 4056987  
269 to 58629226, chromosome 8, from 4670213 to 54625578, chromosome 9, from 6225214 to  
270 63773642, chromosome 10, from 3775719 to 55840828, chromosome 11, from 10947270 to  
271 48379978, and chromosome 12, from 5879033 to 61255621.

## 272 PCoA and genetic structure, Diversities and Linkage disequilibrium

273 The genetic structure and the division in subpopulations were determined by conducting a series  
274 of hierarchical Principal Coordinate Analyses (PCoA). The PCoAs were carried out with a subset  
275 of the variants after filtering. The variant filtering process was comprised of several steps. First,  
276 only the euchromatic variants were considered, and from those only the ones with a call rate lower  
277 than 0.95, also the ones in which the minor allele was present in less than 3 samples were  
278 removed. From the remaining variants, 2000 evenly distributed across the genome were selected.

279 Furthermore, in order to avoid overrepresentation of large regions with complete linkage  
280 disequilibrium, when several consecutive variants had a correlation higher than 0.95, only one of  
281 them was kept. Finally, pairwise distances between samples were calculated (Kosman and  
282 Leonard 2005), and from the distance matrix, a PCoA (Krzanowski and Krzanowski 2000) was  
283 generated following the pycogent implementation. These methods were implemented in the  
284 `do_pca.py` script. Additionally, the genetic structure was also estimated with fastSTRUCTURE  
285 (Raj *et al.*, 2014).

286  
287 The observed and expected heterozygosity and the number of variants per genetic group were  
288 calculated considering only the variants variable in the samples involved in the analysis. The script  
289 that implemented these analyses is `calc_diversities2.py`. The allele spectrum figure was plotted  
290 by the script `calc_maf_trends.py` and the rarefaction curves by `rarefaction_analysis.py`.

291  
292 The linkage disequilibrium (LD) was calculated between euchromatic markers with a major allele  
293 frequency lower than 0.98 following the Rogers and Huff method for loci with unknown phase  
294 (Rogers and Huff 2009).

## 295 GWAS and allele frequencies

296 A heatmap plot that represents the major allele frequency in each group was generated according  
297 to a dendrogram by the method implemented in the Python seaborn library  
298 (<https://seaborn.pydata.org/>) and was plotted by the `get_most_diverse_snps.py` script.

299 A Genome-Wide Association Analysis (GWAS) was carried out with the Genesys R package  
300 (Gogarten *et al.*, 2019) on the set of polymorphic variants (95% threshold). The quantitative  
301 characters were normalized by using the Box and Cox transformation implemented by the Python  
302 `scipy` library (<https://www.scipy.org/>). The character normality was checked with a qqplot plotted  
303 by the Python `statsmodels` library (Seabold and Perktold 2010). The correction for genetic  
304 structure was calculated with a Principal Component Analysis on the filtered variants implemented  
305 by the `SNPRelate` R library with a 0.3 linkage disequilibrium threshold (Zheng *et al.*, 2012). The  
306 quantitative trait associations were tested with the Wald method, and the binomial ones by the  
307 Score one. To account for the multiple tests, a Bonferroni threshold was applied. The step-by-  
308 step implementation of the GWAS analysis can be analyzed in the `gwas.py` script.

## 309 Genetic group distances

310 Two genetic distances among groups were calculated and compared: Nei and Dest (Peakall and  
311 Smouse 2006; 2012). They were implemented by the Python variation library and the  
312 `cacl_pop_dists.py` script. From those distances both a neighbor joining tree and a split network  
313 were calculated using SplitsTree (Huson and Bryant 2006).

## 314 Results

### 315 High through-put genotyping of a European vintage tomato 316 collection

317 To genetically characterize vintage European tomatoes, a total of 1,254 tomato accessions were  
318 used (Supplementary Table S1). That set included an extensive representation of the extant  
319 European vintage tomato variability constituted by 506 accessions from Spain, 305 from Italy, 203  
320 from Greece, 96 from France, and 58 from other origins, with 25 modern commercial cultivars, 39  
321 SP and 22 SLC accessions (the two last ones of American origin) used as references. A total of  
322 3,700 million reads with a mean phred quality of 33.5 were obtained after genotyping-by-  
323 sequencing, providing an average of 2.9 million reads per sample. Out of those, 99.0% were  
324 successfully mapped to the tomato reference genome (v2.50), but only 55.9% were kept after  
325 applying the MAPQ filter with a 57 threshold. These reads were mostly properly paired (96.1%).  
326 Of all of the genomic positions that comprise the reference genome, 0.79% had a per sample  
327 average sequencing coverage higher than 5X, 0.46% higher than 10X and 0.21% higher than  
328 20X. The complete sequencing and mapping statistics for all samples are available in  
329 Supplementary Table S3 and the number of positions per megabase with more than 5 reads in at  
330 least 90% of the samples is represented in Supplementary fig 1. Finally, 448,121 variants were  
331 called by freebayes, and after filtering them, a working dataset of 64,943 variants was created.

### 333 Genetically defining true European vintage tomatoes and its 334 relationship with American relatives

335  
336 To genetically position the European tomato collection relative to South and Mesoamerican  
337 germplasms, which represent early domestication and improvement steps (Blanca *et al.*, 2015),

338 the observed variability of European tomato was analyzed together with SP, SLC, SLxSP hybrids  
339 and a sample of modern cultivars including modern fresh and processing cultivars. A series of  
340 PCoAs (Fig. 1 and 2) was performed comparing vintage and modern vintage collections. The  
341 genetic classification based on these PCoAs can be found in Supplementary Table S1 under the  
342 header rank1 classification.

343  
344 The PCoA performed with this expanded collection (Fig. 1A and 1B), showed that the green fruited  
345 and Galapagos wild species, Peruvian SP (SP), Northern Ecuadorian SP (SP\_NEcu), Ecuadorian  
346 SLC (SLC\_Ecu), Peruvian and Mesoamerican SLC (SLC\_Peru\_MA), as well as several SP x SL  
347 hybrids and admixtures (SPxSL), formed a series of clusters that were clearly separated from the  
348 modern and European vintage tomatoes (Fig. 1A and 1B), with the Peruvian and Mesoamerican  
349 SLC (SLC\_Peru\_MA) being the closest American group to the European vintage tomatoes. To  
350 obtain a further insight into the genetic architecture of the European tomato, the genetic data was  
351 analyzed by using fastSTRUCTURE (Raj *et al.*, 2014). The model marginal likelihoods reached a  
352 plateau by four populations (Supplementary Fig. 2). When this result was compared with the  
353 PCoA classification, the four fastSTRUCTURE populations were found to correspond to: SP,  
354 modern tomatoes, and two distinct vintage populations (Supplementary Fig. 2). It is remarkable  
355 that, according to fastSTRUCTURE, the modern tomato, that has been obtained after crossing  
356 varieties from different sources, was identified as an original population whereas all the wild and  
357 semi-domesticated SLCs, including the Ecuadorian, the Peruvian, and the Mesoamerican ones,  
358 appeared as admixtures.

359  
360  
361 A continuous gradient from vintage to modern rather than clearly split groups was observed in the  
362 PCoA plots (Fig. 1A, 1C and 1D). To define the limits between modern and vintage in the PCoA,  
363 we chose Heinz 1706 as the reference (in pink, Fig. 1 and 2), since it was one of the first tomato  
364 varieties reported to include introgressions from wild *Solanum* species on chromosomes 4, 9, 11  
365 and 13 (Sato *et al.*, 2012; Causse *et al.*, 2013; Menda *et al.*, 2014), typical of modern cultivars  
366 carrying mainly disease resistance genes.

367  
368 PCoA-based classifications indicate that a total of 24.9% of the accessions labelled as vintage  
369 according to their passport data mapped outside the vintage genetic cluster in the PCoA space  
370 and were localized within the modern and SPxSL genetic groups (Fig. 1). This indicates that either  
371 they have been misclassified or correspond to a mixture between vintage and modern varieties.

372 To find introgressions in European tomatoes, a haplotype analysis was performed to reveal  
373 haplotypes not typically found in the vintage materials. For this, the genome was divided into  
374 windows and, in every one of them, the Kosman distances were calculated from the non-vintage  
375 samples to the haplotypes found in the vintage samples. When the analyzed non-vintage sample  
376 haplotype had a non-zero distance to any of the vintage ones, it was marked as distant from the  
377 vintage collection. Several accessions mapping close to the modern varieties in the PCoA space  
378 were consistently found to include haplotypes not present in the vintage group (Supplementary  
379 Fig. 3) and, despite these being initially catalogued as vintage, it was clear that they actually came  
380 from modern breeding programs or were the result of a cross with modern cultivars, and thus  
381 were reclassified as modern genetic material (see Supplementary Table S1).

382  
383 The modern materials (including both modern references and the vintage reclassified as modern)  
384 were spread across the PCoAs according to their use: fresh or processing, and also to their  
385 degree of introgression (Fig. 1C, 1D, and 2, Supplementary Fig. 3). PCoAs, when applied only to  
386 the modern accessions resulted in four groups (Fig. 2): modern processing, modern and  
387 processing long-shelf-life (LSL), modern fresh 1 and modern fresh 2 (Fig. 1 and 2). Modern  
388 processing tomatoes, the most distant group to Heinz 1706, were characterized by introgressions  
389 that included almost the entire chromosome 5 and the beginning of chromosome 11, and small  
390 introgressions in chromosomes 2, 3, 4 and 11 (Supplementary Fig. 3). Modern fresh 1 tomatoes,  
391 distributed across the PCoAs between Modern processing and Heinz 1706, were characterized  
392 by having a large introgression at the beginning of chromosome 11, a small one at the end of the  
393 same chromosome, and another introgression at the beginning of chromosome 6. Modern fresh  
394 2 group, which is closer to Heinz 1706, was characterized by having an introgression at the  
395 beginning of chromosome 11 (Supplementary Fig. 3). The modern LSL and processing group  
396 was genetically very close to Heinz 1706 (in blue, Fig. 1C and 1D, sharing a large part of  
397 chromosome 9, including an introgression considered to be the result of the introduction of the  
398 *Tm-2* gene, conferring resistance to Tomato Mosaic Virus, in modern breeding programs. All of  
399 these haplotypes could be used for the identification of non-true European vintage tomatoes.

## 400 Diversity among European vintage tomatoes

401 European vintage tomatoes are usually considered to have low genetic diversity (Blanca *et al.*,  
402 2015). Therefore, it was important to calculate the number of polymorphic variants present in our  
403 collection of European vintage tomatoes, the largest collection analyzed by sequencing thus far,

404 and to compare it with the variability present in the wild SP, the wild and semi-domesticated SLC,  
405 and the modern cultivars. The number of variants within the European vintage collection was quite  
406 large (26,129), it was even larger than the number found in SP (19,164), in SLC (7,690), or in the  
407 materials classified as modern (17,328). However, this comparison could be biased in favor of  
408 the vintage collection because of the larger number of samples in vintage 890, compared to SP  
409 24, SLC 42, and modern 243.

410  
411 To correct for this factor, diversity indexes were calculated with the same number of samples (20)  
412 (fig 3A) and the analysis was repeated 100 times, with a different set of 20 samples chosen at  
413 random each time. Both the Nei diversity and the percentage of polymorphic variants (with a 95%  
414 threshold) was much higher in the wild SP than in any other group, and, even more relevant, both  
415 indexes were the lowest, by far, in vintage. The analysis indicated that the many of the variants  
416 found in the vintage collection could not be considered polymorphic. At 95 % threshold, the  
417 vintage collection contained only 298 polymorphic variants. This scarcity in polymorphic variants  
418 in the European vintage group can also be observed in the allele frequency spectrum  
419 (Supplementary Fig. 4) in which it is clear that most variants were almost fixed in the vintage  
420 collection.

421  
422 To better compare the amount of genetic variability in each major cultivated group  
423 (SLC\_Peru\_MA, vintage, and modern) a rarefaction analysis was carried out. In this analysis, the  
424 samples were added one at a time, to check if the number of variants, including the ones at very  
425 low frequencies, reached a maximum when more samples were considered (fig 3B). The number  
426 of variants found in the vintage group was always lower than in the modern and SLC\_Peru\_MA  
427 groups. However, the total number of variants within the vintage collection kept increasing as  
428 more samples were added. However, the number of polymorphic variants did stabilize with a few  
429 samples. Finally, the Nei diversity decreased (Supplementary Fig. 6) when more samples were  
430 added. This decrease was due to the high number of variants found within vintage that were close  
431 to fixation.

## 432 Linkage disequilibrium

433 The linkage disequilibrium (LD) was calculated for the genetic groups with enough polymorphic  
434 markers (Minimum Allele Frequency (MAF) > 0.02 threshold) (Supplementary Fig. 6), which were  
435 SP, SLC from Peru and Mesoamerica, modern, and European vintage varieties. Wild SP showed

436 the lowest LD ( $r^2=0.42$ ) at 5 kb and it was also the group in which LD decreased the fastest, being  
437 only  $r^2=0.2$  at 25 Kb. In SLC,  $r^2$  was 0.8 at 5 kb and at 1000 Kb it was still 0.4. Vintage had the  
438 highest LD at 25 Kb ( $r^2=0.97$ ); however, it decreased to the lowest value ( $r^2=0.05$ ) at 1000 Kb.  
439 The modern accessions had a high LD both at 25 Kb ( $r^2=0.9$ ) and at 1000 Kb ( $r^2=0.6$ ). The LD  
440 found at 1000 Kb is likely due to population substructure. SLC and modern had high long range  
441 LDs, perhaps because modern included both fresh and processing accessions, which were  
442 clearly separated in the PCoAs, and SLC contained accessions from Peru and Mesoamerica, two  
443 geographically distant areas. Additionally, modern cultivars often contain introgressions from wild  
444 species, including disease resistance genes, that span large regions for which recombination is  
445 usually suppressed. SP is also known to have a clear population structure (Blanca *et al.*, 2012)  
446 and also showed some long range LD, which clearly supports the conclusion that LD is not due  
447 just to gamete disequilibrium, but to other causes too. The vintage accessions showed the lowest  
448 LD at 1000 Kb perhaps because it has a less remarkable population substructure.

## 449 Classification of vintage tomato clusters

450 To further classify true vintage tomatoes, a series of PCoAs (Supplementary Fig. 7) were  
451 performed. A genetic group was created when several samples that grouped together in the  
452 PCoAs shared their geographic origin or traditional variety name, or some aspect of their  
453 phenotype (Supplementary Table S2) e.g. fruit shape and size. Most vintage samples could be  
454 classified into 27 different genetic groups, using this PCoA strategy, and were named as “*Balearic*  
455 *cherry*”, “*Bell pepper*”, “*Cor de bou*”, “*Greek (grc)*”, “*Italian (ita) ellipsoid*”, “*Ita grc*”, “*Ita small*”,  
456 “*Lemonia*”, “*Liguria*”, “*Long Shelf Life (LSL) da serbo*”, “*LSL heart*”, “*LSL penjar cat*”, “*LSL penjar*  
457 *vlc*”, “*LSL piennolo*”, “*LSL ramellet*”, “*Marmande*”, “*Montserrat*”, “*Muchamiel*”, “*Palosanto pometa*  
458 *1*”, “*Palosanto pometa 2*”, “*Pera girona*”, “*Pimiento*”, “*San Marzano*”, “*Scatolone di bolsena*”,  
459 “*Spagnoletta*”, “*Tondo piccolo*”, “*Valenciano*”.

460  
461 Two connected clusters of genetic groups (for the sake of clarity we will use “group” to refer to a  
462 PCoA group of samples and “cluster” to talk about a cluster of groups) were observed in PCoA  
463 (Supplementary Fig. 7A and 7B). Within the cluster at the center of PCoA, we found the genetic  
464 groups “*LSL ramellet*”, “*LSL penjar vlc*”, “*LSL penjar cat*”, “*LSL ramellet*”, “*Marmande*”,  
465 “*Montserrat*”, “*Bell pepper*”, “*Lemonia*”, “*Muchamiel*”, “*Palosanto pometa 1*”, “*Palosanto pometa*  
466 *2*”, “*Pera girona*”, “*Scatolone di bolsena*”, “*Spagnoletta*” and “*Valenciano*” (Supplementary Fig. 7C  
467 and 7H). These genetic groups belong to Spain, with the exception of “*Marmande*”, “*Bell pepper*”

468 and "*Palosanto pometa 1*", which were represented in all four Mediterranean countries (Spain,  
469 Italy, France and Greece), the Italian "*Scatolone di bolsena*" and "*Spagnoletta*", and the  
470 Greek "*Lemonia*" (Fig. 4A). Outside the central cluster, but close, we found groups of big  
471 tomatoes: "*Liguria*", with accessions mainly collected in Italy, and "*Cor de bou*" and "*Pimiento*",  
472 present in all four countries (Supplementary Fig. 7C and 7D, Fig. 4A and 4B). A second cluster  
473 included mostly Italian accessions classified into the "*Ita ellipsoid*", "*Ita small*", "*LSL da serbo*",  
474 "*LSL piennolo*", "*San Marzano*", and "*Tondo piccolo*" genetic groups, and also some Greek and  
475 Spanish accessions included in the "*grc*", "*Ita grc*", and "*Balearic cherry*" genetic groups, all  
476 characterized by having a small size with no or weak ribbing (Supplementary Fig. 7A, 7B, 7M-R,  
477 Fig. 4A and 4B). In summary, the PCA separated vintage accessions mainly by country of origin  
478 and fruit size. It is interesting to note that the LSL-type accessions, which were highly represented  
479 in the collection, were not grouped together, but rather segregated by country: the Italian LSL  
480 varieties were found within the Italian cluster, and the Spanish LSL within the Spanish cluster.  
481 Several accessions located between the Spanish and the Italian clusters could not be grouped  
482 by passport data or any other characteristic.

483

## 484 Allele frequencies across the genome in Vintage groups and their 485 relationship with phenotypic diversity

486 A clustering of the vintage genetic in groups based on a distance tree was calculated using the  
487 polymorphic variants (95% threshold) (Fig. 4A). This analysis showed that the defined genetic  
488 groups had quite distinct allele frequencies along the genome. Concomitantly, the genetic groups  
489 also showed enrichment in specific phenotypic characteristics related to their horticultural  
490 classification. For example, varieties belonging to the genetic groups "*Pera girona*", "*LSL ramellet*"  
491 and "*LSL penjar vlc*" have colourless skin, while "*Balearic cherry*", "*Tondo piccolo*", "*LSL piennolo*",  
492 "*Lemonia*", "*LSL heart*", "*LSL Penjar vlc*", "*grc*", and "*San Marzano*" showed mostly weak ribbing,  
493 and, finally, "*Spanoletta*" was characterized by its fasciation (Fig. 4B). Moreover, the fruit size was  
494 also different for different genetic groups and clusters "*LSL heart*", "*Ita ellipsoid*", "*Ita small*", "*LSL*  
495 "*da serbo*", "*LSL piennolo*", "*San Marzano*", "*Tondo piccolo*", "*grc*", "*Ita grc*" and "*Balearic cherry*"  
496 were characterized by having a small size, while the rest were medium or large in size.  
497 Furthermore, several noticeable clusters of genetic groups with common phenotypic traits could  
498 be observed. For instance, there was a cluster formed by small-fruited, slightly-ribbed, long shelf-  
499 life and processing Italian genetic groups which included the well-known Italian "*da Serbo*" and



500 “*San Marzano*” tomatoes. Another cluster was comprised mainly by long shelf-life colourless-  
501 skinned Spanish tomatoes, which included the “*LSL penjar cat*”, “*LSL penjar vlc*”, and the “*LSL*  
502 *ramellet*” groups. Interestingly, this cluster also included the Catalonian big fruited “*Montserrat*”  
503 group which, in contrast to the others, were fasciated and used for fresh consumption. Close to  
504 this cluster were some of the most typical Spanish vintage fresh-market varieties: “*Valenciano*”,  
505 “*Muchamiel*” and “*Palosanto pometa 2*”. In addition, big tomatoes appertaining to “*Liguria*”, “*Cor*  
506 *de bou*”, and “*Pimiento*” clustered together.

507  
508 Some of the genetic differences between the groups could be due to genetic drift not related with  
509 the phenotypic variability generated during the history that gave rise to the different vintage  
510 varieties, but allele frequencies of genes involved in the phenotypic variation could have been  
511 selected either inadvertently or consciously by traditional farmers. In order to elucidate whether  
512 the differentiating variants were associated to the phenotypic variation observed in the different  
513 genetic groups a GWAS analysis was carried out using selected fruit characters (Fig. 4C).

514 Two of the main phenotypic characteristics differentiating the vintage tomatoes are fruit weight  
515 (fw) and ribbing (Fig. 4B). In the GWAS analysis fruit weight was associated to variants on  
516 chromosome 1, 3 and 11. The MAF analysis indicated that most of the small fruited tomatoes  
517 such “*LS heart*”, “*Ita ellipsoid*”, “*Ita small*”, “*LSL da serbo*”, “*LSL piennolo*”, “*San Marzano*”, “*Tondo*  
518 *piccolo*”, “*grc*”, “*Ita grc*”, and “*Balearic cherry*” shared the fixation of the same allelic variant in  
519 chromosome 1. The pattern found in chromosome 3 was similar, except for the “*LS heart*” and  
520 “*LSL piennolo*” groups.

521 For ribbing, GWAS revealed association with variants on chromosomes 1, 7, 10 and 11. The  
522 chromosome 1 region was fixed in the weak ribbed groups “*Balearic cherry*”, “*Tondo piccolo*” and  
523 “*LSL piennolo*”. In contrast, almost all medium and large tomatoes, with the exception of  
524 “*Pimiento*” and “*Spanish LSL*” fruits (both showing no or weak ribbing) had a fixed common variant  
525 in chromosome 11 that was associated by GWAS with fruit weight, ribbing at calyx end, and fruit  
526 shape index.

527  
528 Another trait differentiating vintage tomato cultivars was skin colour, for instance, most Spanish  
529 LSL as well as tomatoes included in the “*Cor de bou*”, “*Montserrat*”, and “*Pera girona*” genetic  
530 groups had a colourless skin, which resulted in pinkish fruit (Fig. 4B). GWAS found association  
531 with this pink color in chromosomes 1 (two regions), 3, 5, and 10. The GWAS and MAF analysis  
532 comparison (Fig. 4A and 4C) showed that different pink genetic groups had different allelic  
533 composition in the associated genomic regions, what might reflect a complex genetic control.

534 Fruit shape was associated with regions in chromosomes 2, 5, 10, and 12. The region in  
535 chromosome 2 was fixed in “*Marmande*” and “*Scatolone di bolsena*”, two groups that are well  
536 known for having flat fruits. In addition, “*Valenciano*”, “*Pimiento*”, and “*Liguria*” had the minor allele  
537 almost fixed in the chromosome 10 region. High frequency minor alleles, almost fixed in the  
538 regions associated to fruit shape in the GWAS, were also observed in other genetics groups such  
539 as the Italian “*LSL da serbo*”, in chromosome 5, and “*Ita ellipsoid*” and “*Tondo Piccolo*”, in  
540 chromosome 6 as well as in “*Cor de bou*” and “*Pimiento*” groups, in chromosome 12.

541 In the case of use, associated variants were found in chromosomes 10 and 11, but, in this case,  
542 no clear relationship was found between allelic frequencies among the tomato genetic groups and  
543 GWAS.

## 544 Network analyses supports the differentiation between Spanish 545 and Italian vintage tomatoes and the occurrence of hybridization 546 events in vintage tomatoes across Europe

547 To study the genetic relationships between accessions and groups of accessions, a network  
548 based on pairwise Dist group distances was created with Splitstrees. Evolutionary relationships  
549 are often represented as an unique tree under the assumption that evolution is a branching or  
550 tree-like process (Huson 1998). However, real data does not always clearly support a tree.  
551 Phylogenetic split decompositions represented in a network may be evidence for conflicting  
552 reticulated phylogenies due to gene flow and/or hybridization (Huson 1998).

553 The splitrees network of European tomato is depicted in Fig. 5. The group organization in the  
554 network was structured, like the PCoAs (Supplementary figure 7), in two main country-related  
555 clusters. One cluster was comprised mainly of Spanish vintage groups, which included the  
556 Spanish LSL, “*Muchamiel*”, and “*Montserrat*” types, and another cluster was mostly comprised by  
557 the small fruited Italian LSL and processing groups. Interestingly, the “*Liguria*” group clustered  
558 with Spanish clusters, although the branch that linked it with the core Spanish clusters was quite  
559 large.

560 The degree of reticulation found (Fig. 5) suggested that hybridizations might have occurred  
561 between the ancestors of accessions collected from the same geographical regions. On the other  
562 hand, the groups that included accessions from different countries, such as “*Marmande*”,  
563 “*Pimiento*”, “*Cor de bou*” or “*Palosanto pometa 1*”, were located between the Spanish and Italian  
564 clusters.

565 These groups of mixed origin could be more modern and derived from hybridization from old  
566 Spanish and Italian varieties or, alternatively, they could be very old varieties found across Europe  
567 before the Spanish and the Italian diversification started. To check those possibilities, a  
568 rarefaction analysis was performed of the number of polymorphic sites found in these three  
569 clusters was calculated (Supplementary Fig. 8). The number of polymorphic sites was clearly  
570 higher in the Italian and Spanish clusters and much lower in the mixed origin cluster, an evidence  
571 that supports that Spain and Italy were secondary centers of diversity for the European tomato,  
572 whereas the varieties included in the mixture cluster would be more recent.  
573

## 574 Discussion

### 575 Very low, but discriminant, variation in vintage European tomatoes

576  
577 The genetic diversity of this European vintage collection was very low when compared with the  
578 diversity found in SP or even in SLC. While this result is in agreement with previous surveys on  
579 worldwide SLL accessions carried out with the SolCAP SNP platform (Sim *et al.*, 2012, Blanca *et*  
580 *al.*, 2012; Blanca *et al.*, 2015), the current analysis represents the first estimate obtained using a  
581 comprehensive representation of vintage European tomatoes, and it is relevant to study the role  
582 of Europe as a secondary center for tomato diversification. The low level of diversity found in  
583 these traditional materials was quite striking: after sequencing 0.8% of the genome, only 298  
584 polymorphic variants at the 95% level were found. This result is quite remarkable when we  
585 consider the high phenotypic diversity of vintage tomatoes. Moreover, the high linkage  
586 disequilibrium found in these traditional vintage materials suggests that it is rather unlikely that  
587 the total number of polymorphic blocks would grow much even if whole genome sequences were  
588 to be obtained.

589  
590 Previous studies demonstrated a strong bottleneck during the SLC tomato's travel from Ecuador  
591 and Peru to Mesoamerica (Blanca *et al.*, 2015, Lin *et al.*, 2014; Razifard *et al.*, 2020). However,  
592 it is remarkable that despite the low genetic diversity found in vintage European tomatoes there  
593 are still a few highly polymorphic loci within this tomato gene pool. Some of this variation could  
594 be due to the random nature of genetic drift. However, the association study carried out with major  
595 phenotypical/morphological traits found that a sizeable fraction of those diverse loci were

596 associated with the vintage fruit phenotypical/morphological variation. Therefore, it is quite likely  
597 that many of those polymorphic loci had been under balancing selection (Delph and Kelly, 2014)  
598 during the diversification process and were in fact responsible for a sizeable part of the tomato  
599 phenotypic variation, or, at least, in linkage disequilibrium with the variants selected. It may seem  
600 paradoxical that the high diversity of shapes, colors, sizes, uses, and other agronomic traits in the  
601 vintage group could be maintained by such a poor gene pool, but it seems that the selection  
602 carried out by the traditional growers in favor of this agronomic diversity resulted in a desert of  
603 variation, with just a handful of scattered polymorphic loci. This is consistent with two highly  
604 polymorphic SNPs found by Muños *et al.*, (2011) in the *lc* locus. These were highly polymorphic,  
605 but were surrounded by loci with "drastically reduced" diversity. Thus, they seemed to be the  
606 result of selection for low or high number of locules in different materials.

607 Recently, structural variants (SV) were studied in tomato using new long-read sequencing  
608 technologies and new analysis algorithms (Alonge *et al.*, 2020; Domínguez *et al.*, 2020). A large  
609 number of structural variants were identified and were mostly generated by transposons and  
610 related repeats. Similar to the variants studied here, most structural variants had a very low  
611 frequency, and the majority were singletons.

612 Therefore, the phenotypic diversity present in European vintage tomatoes seems to have been  
613 built by remixing/reshuffling/swapping very few polymorphisms with the selection pressure  
614 associated with the creation of new varietal types and to the adaptation of these types to different  
615 regional environments.

616

## 617 Tomato History: tomato movement in Europe

618  
619 The distribution of the genetic variability in the European vintage tomatoes showed mostly a  
620 continuous gradient. However, the Spanish and Italian varieties occupied opposite regions of the  
621 PCoA space what supports a genetically differentiation among varieties originated in those  
622 countries. The lack of clear-cut limits may be due to migrations between different regions and  
623 countries and subsequent intercrossing. Despite this difficulty, the genetic vintage groups  
624 proposed here were differentiated by characteristics such as: their main geographic origin, use,  
625 fruit morphology, and varietal name. The genetic groups sometimes corresponded with the  
626 varietal type, such as in "Valenciano", "Muchamiel", "Penjar" or "Piennolo". However, the match  
627 between the proposed genetic group and the sample varietal name was seldom complete. For  
628 instance, the "*Cor de bou*" group included two "Valenciano" samples, one "Russe", and one

629 “Costoluto”. This may be due to the limitations of the genotyping or genetic classification  
630 methodology utilized or to erroneous passport data, as it may not be trivial for a standard grower  
631 to evaluate the sometimes subtle varietal differences. Other genetic groups, such “Italian small”  
632 showed no clear associations to any variety name.. Finally, cultivars previously classified as  
633 belonging to some variety, such as “Marmande”, were included in many different genetic groups.  
634 It is likely that the popularity of some varietal types such as “Marmande”, made some growers  
635 prone to apply the label to any variety that displayed the typical morphological characteristics of  
636 a well-known varietal type. Thus, the “Marmande” tomatoes are characterized by its production  
637 of large and multi-locule tomatoes, and any other variety with a similar fruit morphology could  
638 have been labeled as “Marmande”.

639  
640 One clear example of mistaken identities and/or inadvertent out crossing is provided by the  
641 vintage samples that were found to include haplotypes not found in the vintage core and to be  
642 genetically closer to the modern varieties than to the vintage materials in the PCoA. It is not even  
643 trivial to define the borderline between vintage and modern varieties. One could think that until  
644 the 1950’s most varieties were heirlooms and landraces maintained by small farmers, but the real  
645 history is more complex. When tomato cultivation was popularized in the 19th Century in France,  
646 England, and the USA some of the varieties were already provided by seed companies (Boswell  
647 1937), and there were seed shipments documented between countries, for instance, from  
648 England to the Canary Islands (Amador *et al.*, 2012). Moreover, from 1910 onwards, professional  
649 breeding efforts created new varieties adapted to long-distance shipping and for processing  
650 (Boswell 1937). These efforts did not yet include wild materials, so their results are not easy to be  
651 differentiated in a PCoA analysis. It is only when shortly afterwards, breeders started introgressing  
652 wild species alleles for disease resistance, that the varieties created were different enough to be  
653 easily differentiated in the PCoA analysis. In any case, the vintage-modern limit has to be  
654 somewhat conventional, although a characteristic of modern cultivars compared with vintage  
655 varieties is the introgression of genes from wild species. Therefore, true vintage cultivars were  
656 defined based on the absence of wild species haplotypes.

657  
658 Most of these introgressions seem to be related to disease resistance genes as the *Cladosporium*  
659 *fulvum* resistance gene *Cf-2* in chromosome 6, *Tm-2* (resistance Tomato Mosaic virus,) in  
660 chromosome 9. It is likely that the modern genetic variability has been combined with the true  
661 traditional varieties, so some materials catalogued in the genebanks as traditional are in fact a  
662 mixture of traditional and modern. This is to be expected, as the seed collectors/genebanks label

663 as vintage any material considered as such by the farmer from whom the seeds were collected.  
664 Although European small farmers often save their own tomato seed, they may occasionally  
665 purchase or get plantlets from markets or nurseries or save seeds from modern varieties  
666 purchased in the market and introduce them in their fields. This may lead after several years of  
667 reproduction and farmer selection to complex hybridizations and mixings. Clearly, there have  
668 been many opportunities for introgressing modern haplotypes into the vintage materials, such as  
669 unintentional crosses. This phenomenon could be thought of as blurring the boundaries of a  
670 supposedly pure vintage population, but one may also think that this leakage had the positive  
671 unintended consequence of increasing the very low diversity of the vintage pool, and it is also the  
672 case that evolution consists of change and adaptation of local varieties (Casañas *et al.*, 2017).

673  
674 The allele frequency based tree (Fig. 4) defined three major clusters: Spanish, Italian, and Mixed  
675 origin. The mixed origin groups are basal in the Fig.4 tree, have longer branch lengths, and occupy  
676 an intermediate position between the Italian and Spanish clusters in the Dest network (Fig. 5).  
677 These results are compatible with the hypothesis that Italy and Spain formed two centers of  
678 diversity. The differentiation of Italian and Spanish gene pools is exemplified by the long LSL  
679 varieties from both countries. Italian and Spanish LSL varieties were clustered apart from each  
680 other with only a small number of samples from the other country, so it seems as if the origin of  
681 the long shelf life tomatoes in both countries was independent. The transformation from a fresh  
682 to a long shelf-life variety is likely due to a limited number of loci, as observed in Fig. 4 in which  
683 the Catalanian fresh “Montserrat” type is closely related to the Catalanian long shelf-life “Penjar”  
684 type. Esposito *et al* (2020) also observed geographic differentiation of the Italian and Spanish  
685 long shelf-life varieties. Therefore, although there may have been migrations from Italy to Spain  
686 and vice versa, these may not have been extensive enough to erase the genetic differences  
687 between the Italian and Spanish varieties

688  
689 Regarding the mixture cluster, the groups included in it are basal in the Fig.4 tree, they have  
690 longer branch lengths, and occupy an intermediate position between the Italian and Spanish  
691 clusters in the Dest network (Fig. 5). Moreover, the rarefaction analysis supports that it included  
692 varieties derived from the two secondary centers of diversity. This could be the result of long of  
693 tomato cultivation tradition in Southern Europe, being the groups included in this cluster  
694 developed from hybridizations between the two centers of diversity. New mutations, other  
695 introductions of tomatoes from America or new genes from varieties developed worldwide might  
696 also be involved in the history of the groups of mixed origin.

697  
698 A complex pattern of migrations can also be inferred in several genetic groups as the “*Cor de*  
699 *bou*” group that included varieties from most countries: French “Coeur de boeuf”, Italian “Cuor di  
700 bue”, Catalanian “Cor de bou”, Castillian “Corazon de toro”, and “Navarran corazón de fitero”.  
701 Also, the Italian “Spagnoletta” group was closely related with the “*Marmande*” group comprised  
702 by French, Spanish, Greek, and Italian accessions. Other genetic groups with mixed geographic  
703 origin are “*Liguria*”, “*Cor de bou*”, “*Pimiento*”, “*Palosanto Pometa 1*” and “*Marmande*”.  
704

705 Do a few Polymorphic genes differentiate the true European vintage tomato  
706 genetic groups?

707  
708 In order to shed light on the apparent contradiction between the low genetic diversity and the  
709 large phenotypic variation of European vintage tomatoes, a GWAS was carried out with the  
710 polymorphic variants and some of the most obvious morphological traits (fruit morphology, color,  
711 and ripening behavior).  
712 Variants located in the genomic regions of previously identified loci involved in fruit weight, and  
713 likely involved in domestication and diversification, were associated with this trait in the GWAS  
714 performed with the European vintage collection. Most of the small fruited tomatoes shared fixed  
715 variation regions in chromosomes 1 and 3 which mapped close to previously-described  
716 Quantitative Trait Loci (QTL) and genes associated with fruit size: *fw1.1* (Grandillo *et al.*, 1999)  
717 and *fw3.2/KLUH* and *ENO* (Chakrabarti *et al.*, 2013; Yuste-Lisbona *et al.*, 2020) (Fig. 4A and 4B).  
718 In contrast, almost all medium and large tomatoes shared a region in chromosome 11 that  
719 mapped close to *FAS* (Xu *et al.*, 2015) and *fw1.3/CSR* (Mu *et al.*, 2017), with both genes playing  
720 a known role in controlling fruit size and fasciation. No more associations were observed in other  
721 genomic regions for fruit weight, so it seems reasonable to think that these QTLs can be  
722 responsible, at least in part, for the fruit size variability among the European vintage tomatoes.  
723 Regarding fruit shape, two of the associated regions found included known genes. The  
724 chromosome 2 region included previously mapped QTLs as heart shape *hrt2.2* (heart shape),  
725 *pblk2.2* (proximal end blockiness), *psh2.2* (shoulder height), *piar2.2* (indentation area) (Brewer *et*  
726 *al.*, 2007) and *ovate* (Liu *et al.*, 2002), and the region in chromosome 10 is located close to, where  
727 the original copy of the *sun* locus was found (Xiao *et al.*, 2008). In the case of skin color, a different  
728 pattern was characteristic of different pink genetic groups. “*LSL Penjar vlc*” and “*LSL ramellet*”

729 shared a variant at the end of chromosome 1 that matched a region that was previously  
730 associated with skin color, the colorless-peel and locus (Ballester *et al.*, 2010), while “*Pera*  
731 *Girona*” had the minor allele for the other chromosome 1 variant, which is located at the beginning  
732 of the chromosome and maps close to the SICMT3 (Gallusci *et al.*, 2016) and PSY3 (Li *et al.*,  
733 2008) genes involved in epigenetic ripening regulation and carotene biosynthesis, respectively.

734  
735 The current analysis suggests that fruit morphology variability among European vintage tomatoes  
736 could be the consequence of the combination of a relatively low number of genes, as suggested  
737 by Rodriguez *et al.*, (2011), including *fw3.2/KLUH*, *ENO*, *FAS*, *SUN*, and *OVATE*. On the other  
738 hand, skin color could be a consequence of *y*-locus and other genes related to phenylpropanoid  
739 metabolism. Interestingly, SV mutations have been found in *fw3.2/KLUH*, *FAS* and *SUN* that  
740 supports the impact of SV on tomato phenotypic diversity (Alonge *et al.*, 2020, Dominguez *et al.*,  
741 2020). Also some cryptic variation hidden in the Mesoamerican tomatoes may have emerged in  
742 European tomatoes after generating new combinations and divergent selection by the traditional  
743 farmers as found for the jointless trait in tomato (Soyk *et al.*, 2017, Soyk *et al.*, 2019, Alonge *et*  
744 *al.*, 2020).

## 745 Impact on genebank and on farm variability management

746  
747 Many of the few polymorphic genetic variants, within the very low diversity European vintage  
748 tomatoes, appeared to be associated with phenotypic variation. This has implications for the  
749 conservation efforts carried out by the genebanks. Thousands of European vintage tomatoes are  
750 maintained in many of those genebanks. However, the cost of these conservation efforts could  
751 be severely reduced if only these few polymorphic loci were taken into account. Of course, that  
752 would ignore most variants, the ones found in very low frequencies, but conserving these low  
753 frequency alleles, that in many cases would be neutral, and thus not associated with any  
754 phenotypic variation, requires a sizeable investment. An alternative would be to identify the alleles  
755 associated with a phenotype, however, that would require an exhaustive phenotypic  
756 characterization.

757  
758 Most of the European accessions analyzed here were collected from farmers in the 1950’s to  
759 1980’s, and as landraces, they are appreciated, competitive, and cultivated varieties. The genetic  
760 diversity of many other crops has also been maintained as landraces that evolved on-farm.  
761 However, this diversity is continuously under threat by the introduction of new modern varieties



762 derived from a limited gene pool that have replaced the vintage varieties. It is generally believed  
763 that most of the accessions in seed banks do not contribute to modern varieties (Tanksley and  
764 McCouch, 1997) and this is also the case for tomato. Our Identification of the morphological and  
765 genetic structure present in the European vintage tomato gene pool will be important to guarantee  
766 access to that variability as the basis of the development of new varieties or evolved landraces in  
767 the future (Casañas et al 2017).

## 768 Conclusion

769 The entrepreneurship of many local European farmers during the last five hundred years has  
770 managed to create a very complex and diverse set of tomato varieties adapted to different local  
771 tastes and morphological preferences. These localized activities did not restrain those farmers  
772 from importing other interesting novelties developed by other farmers elsewhere, thus generating  
773 a much larger set of varietal tomato types that are characterized by an exuberant diversity that  
774 serves as a variety for fresh, processing, and long shelf-life uses.

775  
776 The current report shows that such a plethora of different types has been created from an original  
777 material devoid of genetic diversity, by exploiting very few polymorphic loci subjected to balancing  
778 selection.

## 780 Supplementary Data

781  
782 Fig. S1 Number of genomic positions with high coverage and number of variants per megabase  
783 along the genome in all accessions.

784 Fig. S2. FastSTRUCTURE analysis.

785 Fig. S3. Introgressed regions along the genome detected in the modern genetic groups

786 Fig. S4. Major Allele Frequency spectrum in vintage, modern, and SCL\_Peru\_MA

787 Fig. S5. Rarefaction analysis of the expected heterozygosity for each genetic group

788 Fig. S6. Genome-wide linkage disequilibrium (LD) decay in wild, *S. lycopersicum* var. *cerasiforme*  
789 (SLC), vintage, and modern accession groups.

790 Fig. S7. Hierarchical Principal Coordinate Analysis of European vintage tomato varieties

791 Fig. S8. Rarefaction analysis of the number of polymorphic variants (95% threshold)

792

793 Table S1. Accessions analyzed in this study.

794 Table S2. Phenotypic characterization of European vintage tomatoes

795 Table S3. Sequencing and mapping statistics for each sample.

796

## 797 Acknowledgments

798

799 Authors want to thank Maurizio E. Picarella for expert technical assistance. CNR-IBBR  
800 acknowledges the seed donors ARCA2021, Cristian Patané (CNR-IVALSA, Catania, Italy), La  
801 Semiorto Sementi SRL and the Leibniz Institute of Plant Genetics and Crop Plant Research and  
802 the Gene Bank of DNR-IBBR (Bari, Italy). We also thank Universitat Illes Balears, the Greek Gene  
803 Bank (GGB-NAGREF), Università degli Studi Mediterranea Reggio Calabria for seed sharing.  
804 This work was supported by European Commission H2020 research and innovation program  
805 through TRADITOM grant agreement No. 634561, G2P-SOL, grant agreement No. 677379, and  
806 HARNESSTOM grant agreement No. 101000716. Mariola Plazas is grateful to Spanish Ministerio  
807 de Ciencia e Innovación for a post-doctoral grant (IJC2019-039091-  
808 I/AEI/10.13039/501100011033).

809

## 810 Author contributions

811

812

813 JB and JC analysed the data and drafted the manuscript. J M-P, D S-M, PZ, RF analysed the  
814 data. CP obtained the DNA, field trial phenotypic data and revised manuscript.

815 LF, JF, MP, JLR, ARiccini, SP, ARuggiero and MS obtained field trial phenotypic data. JC  
816 obtained field trial phenotypic data, selected and provided vintage varieties. SG, AK, GG, MC, SG,  
817 AM, MC, MJD, JP, selected and provided vintage varieties and revised the manuscript. DZ  
818 coordinated the field trial. AJM and AG conceived and coordinated the study and revised the  
819 manuscript.

820

## 821 Data Availability

822 The sequence data can be found in NCBI (<https://www.ncbi.nlm.nih.gov/sra>) under the accession  
823 number PRJNA722111.

824

## 825 References

- 826 **Alonge M, Wang XG, Benoit M, K et al.,** 2020. Major impacts of widespread structural  
827 variation on gene expression and crop improvement in tomato. *Cell* **182**, 145-161.
- 828 **Amador L, Santos B, Ríos D.** 2012. Variedades tradicionales de tomates de Canarias.  
829 Tenerife (Spain): Cultivos y Tecnología Agraria de Tenerife.
- 830 **Baird NA, Etter PD, Atwood TS, Currey MC, Shiver AL, Lewis ZA, Selker EU, Cresko WA,**  
831 **Johnson EA.** 2008. Rapid SNP discovery and genetic mapping using sequenced RAD  
832 markers. *Plos One* **3**, e3376.
- 833 **Ballester AR, Molthoff J, de Vos R, Hekkert BTL, Orzaez D, Fernandez-Moreno JP, Tripodi**  
834 **P, Grandillo S, Martin C, Heldens J, Ykema M, Granell A, Bovy A.** 2010. Biochemical and  
835 molecular analysis of pink tomatoes: deregulated expression of the gene encoding transcription  
836 factor S1MYB12 leads to pink tomato fruit color. *Plant Physiology* **152**, 71-84.
- 837 **Bauchet G, Causse M.** 2012. Genetic diversity in tomato (*Solanum lycopersicum*) and its wild  
838 relatives. . In: Caliskan M, ed. Genetic diversity in plants. Rijeka (Croatia): InTech, 138-162
- 839 **Blanca J, Canizares J, Cordero L, Pascual L, Diez MJ, Nuez F.** 2012. Variation Revealed by  
840 SNP Genotyping and Morphology Provides Insight into the Origin of the Tomato. *Plos One* **7**,  
841 e48198
- 842 **Blanca J, Montero-Pau J, Sauvage C, Bauchet G, Illa E, Diez MJ, Francis D, Causse M,**  
843 **van der Knaap E, Canizares J.** 2015. Genomic variation in tomato, from wild ancestors to  
844 contemporary breeding accessions. *BMC Genomics* **16**, 257
- 845 **Boswell VR. 1937.** improvement and genetics of tomatoes, peppers and eggplant. In: Yearbook  
846 of the United States Department of Agriculture. Washington (MA): Government Print Office, 177-  
847 206
- 848 **Brewer MT, Moyseenko JB, Monforte AJ, van der Knaap E.** 2007. Morphological variation in  
849 tomato: a comprehensive study of quantitative trait loci controlling fruit shape and development.  
850 *Journal of Experimental Botany* **58**, 1339-1349.
- 851 **Casals J, Rivera A, Sabate J, del Castillo RR, Simo J.** 2019. cherry and fresh market  
852 tomatoes: differences in chemical, morphological, and sensory traits and their implications for  
853 consumer acceptance. *Agronomy-Basel* **9**, 18.
- 854 **Casanas F, Simo J, Casals J, Prohens J.** 2017. toward an evolved concept of landrace.  
855 *Frontiers in Plant Science* **8**, 7.
- 856 **Causse M, Desplat N, Pascual L, Le Paslier MC, Sauvage C, Bauchet G, Berard A, Bounon**  
857 **R, Tchoumakov M, Brunel D, Bouchet JP.** 2013. Whole genome resequencing in tomato  
858 reveals variation associated with introgression and breeding events. *BMC Genomics* **14**, 14.
- 859 **Chakrabarti M, Zhang N, Sauvage C, Munos S, Blanca J, Canizares J, Diez MJ, Schneider**

- 860 **R, Mazourek M, McClead J, Causse M, van der Knaap E.** 2013. A cytochrome P450  
861 regulates a domestication trait in cultivated tomato. *Proceedings of the National Academy of*  
862 *Sciences of the United States of America* **110**, 17125-17130.
- 863 **Delph LF, Kelly JK.** 2014. On the importance of balancing selection in plants. *New Phytologist*  
864 **201**, 45-56.
- 865 **Dominguez M, Dugas E, Benchouaia M, Leduque B, Jimenez-Gomez JM, Colot V,**  
866 **Quadrona L.** 2020. The impact of transposable elements on tomato diversity. *Nature*  
867 *Communications* **11**, 4058
- 868 **Elshire RJ, Glaubitz JC, Sun Q, Poland JA, Kawamoto K, Buckler ES, Mitchell SE.** 2011. A  
869 robust, simple genotyping-by-sequencing (GBS) approach for high diversity species. *Plos One*  
870 **6**, e19379
- 871 **Esposito S, Cardi T, Campanelli G, Sestili S, Diez MJ, Soler S, Prohens J, Tripodi P.** 2020.  
872 ddRAD sequencing-based genotyping for population structure analysis in cultivated tomato  
873 provides new insights into the genomic diversity of Mediterranean 'da serbo' type long shelf-life  
874 germplasm. *Horticulture Research* **7**, 134
- 875 **Gallusci P, Hodgman C, Teyssier E, Seymour GB.** 2016. DNA methylation and chromatin  
876 regulation during fleshy fruit development and ripening. *Frontiers in Plant Science* **7**, 14.
- 877 **Garcia-Martinez S, Andreani L, Garcia-Gusano M, Geuna F, Ruiz JJ.** 2006. Evaluation of  
878 amplified fragment length polymorphism and simple sequence repeats for tomato germplasm  
879 fingerprinting: utility for grouping closely related traditional cultivars. *Genome* **49**, 648-656.
- 880 **Garrison E, Marth G.** 2012. Haplotype-Based Variant Detection from Short-Read Sequencing.  
881 ArXiv, 1207.3907.
- 882 **Gogarten SM, Sofer T, Chen H, Yu CY, Brody JA, Thornton TA, Rice KM, Conomos MP.**  
883 2019. Genetic association testing using the GENESIS R/Bioconductor package. *Bioinformatics*  
884 **35**, 5346-5348.
- 885 **Grandillo S, Ku HM, Tanksley SD.** 1999. Identifying the loci responsible for natural variation in  
886 fruit size and shape in tomato. *Theoretical and Applied Genetics* **99**, 978-987.
- 887 **Harvey M.** 2004. *Exploring the tomato: transformations of nature, society and economy.*  
888 Cheltenham(UK): Edward Elgar Publishing.
- 889 **Huson DH, Bryant D.** 2006. Application of phylogenetic networks in evolutionary studies.  
890 *Molecular Biology and Evolution* **23**, 254-267.
- 891 **Kosman E, Leonard KJ.** 2005. Similarity coefficients for molecular markers in studies of  
892 genetic relationships between individuals for haploid, diploid, and polyploid species. *Molecular*  
893 *Ecology* **14**, 415-424.
- 894 **Krzanowski WJ, Krzanowski WJ.** 2000. *Principles of multivariate analysis: a user's*  
895 *perspective.* 2<sup>nd</sup> Edition. New York(NY): Oxford University Press.

- 896 **Li FQ, Vallabhaneni R, Wurtzel ET.** 2008. PSY3, a new member of the phytoene synthase  
897 gene family conserved in the poaceae and regulator of abiotic stress-induced root  
898 carotenogenesis. *Plant Physiology* **146**, 1333-1345.
- 899 **Li H.** 2011. Improving SNP discovery by base alignment quality. *Bioinformatics* **27**, 1157-1158.
- 900 **Li H, Handsaker B, Wysoker A, Fennell T, Ruan J, Homer N, Marth G, Abecasis G, Durbin**  
901 **R, Genome Project Data P.** 2009. The Sequence Alignment/Map format and SAMtools.  
902 *Bioinformatics* **25**, 2078-2079.
- 903 **Li H.** 2013. Aligning sequence reads, clone sequences and assembly contigs with BWA-MEM.  
904 ArXiv, 1303.3997.
- 905 **Lin T, Zhu GT, Zhang JH, K et al.,.** 2014. Genomic analyses provide insights into the history of  
906 tomato breeding. *Nature Genetics* **46**, 1220-1226.
- 907 **Liu JP, Van Eck J, Cong B, Tanksley SD.** 2002. A new class of regulatory genes underlying  
908 the cause of pear-shaped tomato fruit. *Proceedings of the National Academy of Sciences of the*  
909 *United States of America* **99**, 13302-13306.
- 910 **Luckwill LC.** 1943. The genus *Lycopersicon*; an historical, biological, and taxonomic survey of  
911 the wild and cultivated tomatoes. *Aberdeen University Studies* 120. Aberdeen: The University  
912 Press.
- 913 **Mazzucato A, Papa R, Bitocchi E, Mosconi P, Nanni L, Negri V, Picarella ME, Siligato F,**  
914 **Soressi GP, Tiranti B, Veronesi F.** 2008. Genetic diversity, structure and marker-trait  
915 associations in a collection of Italian tomato (*Solanum lycopersicum* L.) landraces. *Theoretical*  
916 *and Applied Genetics* **116**, 657-669.
- 917 **McCue GA.** 1952. The history of the use of the tomato: an annotated bibliography. *Annals*  
918 *Missouri Botanical Garden* **39**, 289-348.
- 919 **Menda N, Strickler SR, Edwards JD, Bombarely A, Dunham DM, Martin GB, Mejia L,**  
920 **Hutton SF, Havey MJ, Maxwell DP, Mueller LA.** 2014. Analysis of wild-species introgressions  
921 in tomato inbreds uncovers ancestral origins. *BMC Plant Biology* **14**, 16.
- 922 **Mu Q, Huang ZJ, Chakrabarti M, Illa-Berenguer E, Liu XX, Wang YP, Ramos A, van der**  
923 **Knaap E.** 2017. Fruit weight is controlled by Cell Size Regulator encoding a novel protein that is  
924 expressed in maturing tomato fruits. *Plos Genetics* **13**, e1006930.
- 925 **Muggeo VMR.** 2003. Estimating regression models with unknown break-points. *Statistics in*  
926 *Medicine* **22**, 3055-3071.
- 927 **Munos S, Ranc N, Botton E, Berard A, Rolland S, Duffe P, Carretero Y, Le Paslier MC,**  
928 **Delalande C, Bouzayen M, Brunel D, Causse M.** 2011. increase in tomato locule number is  
929 controlled by two Single-Nucleotide Polymorphisms located near WUSCHEL. *Plant Physiology*  
930 **156**, 2244-2254.
- 931 **Park YH, West MAL, St Clair DA.** 2004. Evaluation of AFLPs for germplasm fingerprinting and

- 932 assessment of genetic diversity in cultivars of tomato (*Lycopersicon esculentum* L.). Genome  
933 **47**, 510-518.
- 934 **Peakall R, Smouse PE**. 2006. Genalex 6: Genetic analysis in Excel. Population genetic  
935 software for teaching and research. Molecular Ecology Notes **6**, 288–95.
- 936
- 937 **Peakall R, Smouse PE**. 2012. GenAIEx 6.5: genetic analysis in Excel. Population genetic  
938 software for teaching and research-an update. Bioinformatics **28**, 2537-2539.
- 939 **Pons C, Blanca B, Cañizares J, Ziasolo P, Finkers R, Rambla JL; da Silva GE, Zacarias L,**  
940 **Monforte AJ, Granell A**. 2017. Variability in fruit ripening within the European traditional pool of  
941 tomato varieties. SOLCUC2017. Valencia, Spain, September 6-7, 2017.
- 942 **Raj A, Stephens M, Pritchard JK**. 2014. fastSTRUCTURE: Variational inference of population  
943 structure in large SNP data sets. Genetics **197**, 573-589.
- 944 **Razifard H, Ramos A, Della Valle AL, Bodary C, Goetz E, Manser EJ, Li X, Zhang L, Visa S,**  
945 **Tieman D, van der Knaap E, Caicedo AL**. 2020. Genomic evidence for complex domestication  
946 history of the cultivated tomato in Latin America. Molecular Biology and Evolution **37**, 1118-  
947 1132.
- 948 **Rick CM, Fobes JF**. 1975. Allozyme variation in the cultivated tomato and closely related  
949 species. Bulletin of the Torrey Botanical Club **102**, 376-384.
- 950 **Rick CM, Zobel RW, Fobes JF**. 1974. Four peroxidase loci in red-fruited tomato species:  
951 genetics and geographic distribution. Proceedings of the National Academy of Sciences of the  
952 United States of America **71**, 835-839.
- 953 **Robbins MD, Sim SC, Yang WC, Van Deynze A, van der Knaap E, Joobeur T, Francis DM.**  
954 2011. Mapping and linkage disequilibrium analysis with a genome-wide collection of SNPs that  
955 detect polymorphism in cultivated tomato. Journal of Experimental Botany **62**, 1831-1845.
- 956 **Rodriguez GR, Munos S, Anderson C, Sim SC, Michel A, Causse M, Gardener BBM,**  
957 **Francis D, van der Knaap E**. 2011. Distribution of SUN, OVATE, LC, and FAS in the Tomato  
958 Germplasm and the Relationship to Fruit Shape Diversity. Plant Physiology **156**, 275-285.
- 959 **Rogers AR, Huff C**. 2009. Linkage Disequilibrium Between Loci With Unknown Phase.  
960 Genetics **182**, 839-844.
- 961 **Sacco A, Ruggieri V, Parisi M, Festa G, Rigano MM, Picarella ME, Mazzucato A, Barone A.**  
962 2015. Exploring a tomato landraces collection for fruit-related traits by the aid of a high-  
963 throughput genomic platform. Plos One **10**, e0137139.
- 964 **Sahagún B**. 1577. Historia general de las cosas de Nueva España por el fray Bernardino de  
965 Sahagún: el Códice Florentino. Libro X: del pueblo, sus virtudes y vicios, y otras naciones.  
966 Florence: Biblioteca Medicea Laurenziana

- 967 **Sanfuentes-Echeverría O.** 2006. Europa y su percepción del nuevo mundo a través de las  
968 especies comestibles y los espacios americanos en el siglo XVI *Historia (Santiago)* **39**, 531-  
969 556.
- 970 **Sato S, Tabata S, Hirakawa H, et al.,** 2012. The tomato genome sequence provides insights  
971 into fleshy fruit evolution. *Nature* **485**, 635-641.
- 972 **Seabold S, Perktold J.** 2010. Statsmodels: econometric and statistical modeling with Python.  
973 In: Walt S, Willman J Eds. 9th Python in Science Conference (SciPy 2010). Austin, TX, June 28-  
974 July 3, 2010 Proceedings, **92-96**.
- 975 **Sim SC, Robbins MD, van Deynze A, Michel AP, Francis DM.** 2011. Population structure and  
976 genetic differentiation associated with breeding history and selection in tomato (*Solanum*  
977 *lycopersicum* L.). *Heredity* **106**, 927-35.
- 978 **Sim SC, Durstewitz G, Plieske J, Wieseke R, Ganai MW, Van Deynze A, Hamilton JP, Buell**  
979 **CR, Causse M, Wijeratne S, Francis DM.** 2012a. Development of a large SNP genotyping  
980 array and generation of high-density genetic maps in tomato. *Plos One* **7**, e40563
- 981 **Sim SC, Van Deynze A, Stoffel K, Douches DS, Zarka D, Ganai MW, Chetelat RT, Hutton**  
982 **SF, Scott JW, Gardner RG, Panthee DR, Mutschler M, Myers JR, Francis DM.** 2012b. High-  
983 density SNP genotyping of tomato (*Solanum lycopersicum* L.) reveals patterns of genetic  
984 variation due to breeding. *Plos One* **7**, e45520.
- 985 **Soyk S, Lemmon ZH, Oved M, Fisher J, Liberatore KL, Park SJ, Goren A, Jiang K, Ramos**  
986 **A, van der Knaap E, Van Eck J, Zamir D, Eshed Y, Lippman ZB.** 2017. Bypassing negative  
987 epistasis on yield in tomato imposed by a domestication gene. *Cell* **169**, 1142-1155.
- 988 **Soyk S, Lemmon ZH, Sedlazeck FJ, Jimenez-Gomez JM, Alonge M, Hutton SF, Van Eck J,**  
989 **Schatz MC, Lippman ZB.** 2019. Duplication of a domestication locus neutralized a cryptic  
990 variant that caused a breeding barrier in tomato. *Nature Plants* **5**, 471-479.
- 991 **Tanksley SD, McCouch SR.** 1997. Seed banks and molecular maps: Unlocking genetic  
992 potential from the wild. *Science* **277**, 1063-1066.
- 993 **Williams CE, Stclair DA.** 1993. Phenetic relationships and levels of variability detected by  
994 Restriction-Fragment-Length-Polymorphism and Random Amplified Polymorphic DNA analysis  
995 of cultivated and wild accessions of *Lycopersicon esculentum*. *Genome* **36**, 619-630.
- 996 **Xiao H, Jiang N, Schaffner E, Stockinger EJ, van der Knaap E.** 2008. A retrotransposon-  
997 mediated gene duplication underlies morphological variation of tomato fruit. *Science* **319**, 1527-  
998 1530.
- 999 **Xu C, Liberatore KL, MacAlister CA, Huang ZJ, Chu YH, Jiang K, Brooks C, Ogawa-**  
1000 **Ohnishi M, Xiong GY, Pauly M, Van Eck J, Matsubayashi Y, van der Knaap E, Lippman**  
1001 **ZB.** 2015. A cascade of arabinosyltransferases controls shoot meristem size in tomato. *Nature*  
1002 *Genetics* **47**, 784-792.
- 1003 **Yuste-Lisbona FJ, Fernandez-Lozano A, Pineda B, Bretones S, Ortiz-Atienza A, Garcia-**

1004 **Sogo B, Muller NA, Angosto T, Capel J, Moreno V, Jimenez-Gomez JM, Lozano R.** 2020.  
1005 ENO regulates tomato fruit size through the floral meristem development network. Proceedings  
1006 of the National Academy of Sciences of the United States of America **117**, 8187-8195.

1007 **Zheng XW, Levine D, Shen J, Gogarten SM, Laurie C, Weir BS.** 2012. A high-performance  
1008 computing toolset for relatedness and principal component analysis of SNP data. Bioinformatics  
1009 **28**, 3326-3328.

1010

## 1011 Figure Legends

1012

1013 Fig. 1. Principal Coordinate Analysis (PCoA) including cultivated tomato (*Solanum lycopersicum*  
1014 var. *lycopersicum*, SLL): vintage European tomato, modern cultivars with different culinary use  
1015 (fresh, processing and long shelf life, Isl), *S. lycopersicum* var. *cerasiforme* (SLC) from different  
1016 origin [Peru, Mesoamerica (MA) Ecuador (Ecu)], together with several American wild relatives: *S.*  
1017 *pimpinellifolium* (SP), *S. cheesmaniae*, *S. galapagense* (Galápagos), *S. peruvianum*, *S.*  
1018 *chmielewskii* and *S. habrochaites* (green) and SPxSL hybrids. The modern cultivar Heinz1706  
1019 was included as reference. (A) First and second principal components (dim1 and dim2) from the  
1020 PCoA using all accessions analyzed in this study. (B) First and third components (dim1 and dim3)  
1021 from the same PCoA. C) First and second components (dim1 and dim2) from PCoA using only *S.*  
1022 *lycopersicum* var. *lycopersicum* samples. D) First and third components (dim1 and dim3) from the  
1023 previous PCoA The percentage of explained variance for each principal component is indicated  
1024 on each axis.

1025

1026 Fig. 2. Principal Coordinate Analysis (PCoA) of modern cultivars. (A) and (B) the three first  
1027 principal components (dim1, dim2 and dim3) from the PCoA considering all modern cultivars and  
1028 cv. Heinz1706 as reference. (C) and (D) PCoA including only modern fresh 2 and Long Shelf Llife  
1029 (LSL) and modern processing genetic groups. The variance accounted for each principal  
1030 component is depicted on each axis.

1031

1032 Fig. 3. Genetic diversity for the rank1 genetic groups. (A) Genetic diversity estimated by the  
1033 expected heterozygosity and the percentage of polymorphic variants (95% threshold). The  
1034 indexes were calculated 100 times taking 20 samples at random from each genetic group. The  
1035 mean and standard deviation are shown. (B) Rarefaction analysis of the number of variants found  
1036 in each genetic group. Axis X shows the number of samples, Axis Y shows the number of variants.



1037

1038 Fig. 4. Allele frequencies across the genome in Vintage genetic groups and their relationship with  
1039 phenotypic diversity. (A) Clustering of genetic groups based on allele frequencies. Allele  
1040 frequency of the major allele within each genetic group is indicated by a density color according  
1041 the legend (blue, frequency=0, to white, frequency=1). (B) Distribution of the different traits within  
1042 genetic groups. (C) Statistical significance indicated by a colored gradient of  $-\log(p)$  values of the  
1043 SNP-trait associations by Genome-Wide Association Analysis.

1044

1045 Fig. 5. Evolutionary relationships between vintage European tomato, Modern tomato and Peru  
1046 and Mesoamerica *Solanum lycopersicum* var. *cerasiforme* (SLC), *S. pimpinellifolium* (SP) and the  
1047 hybrids SPxSL. Split network based on the Dest distances between genetic groups. The country  
1048 of origin of accessions within each genetic group is represented by a pie chart depicted in the  
1049 bottom left. (A) Zoom only in European modern and vintage tomatoes. (B) Zoom on American  
1050 ancestral and wild tomatoes. Each edge of the network represents a split of the accessions based  
1051 on one or more characteristics. If there was no conflict, each split was represented by a single  
1052 edge, while in the case of contradictory patterns the partition was represented by a set of parallel  
1053 edges. The edge lengths represent the weight of each split, which is equivalent to the distance  
1054 between groups.

1055

**A**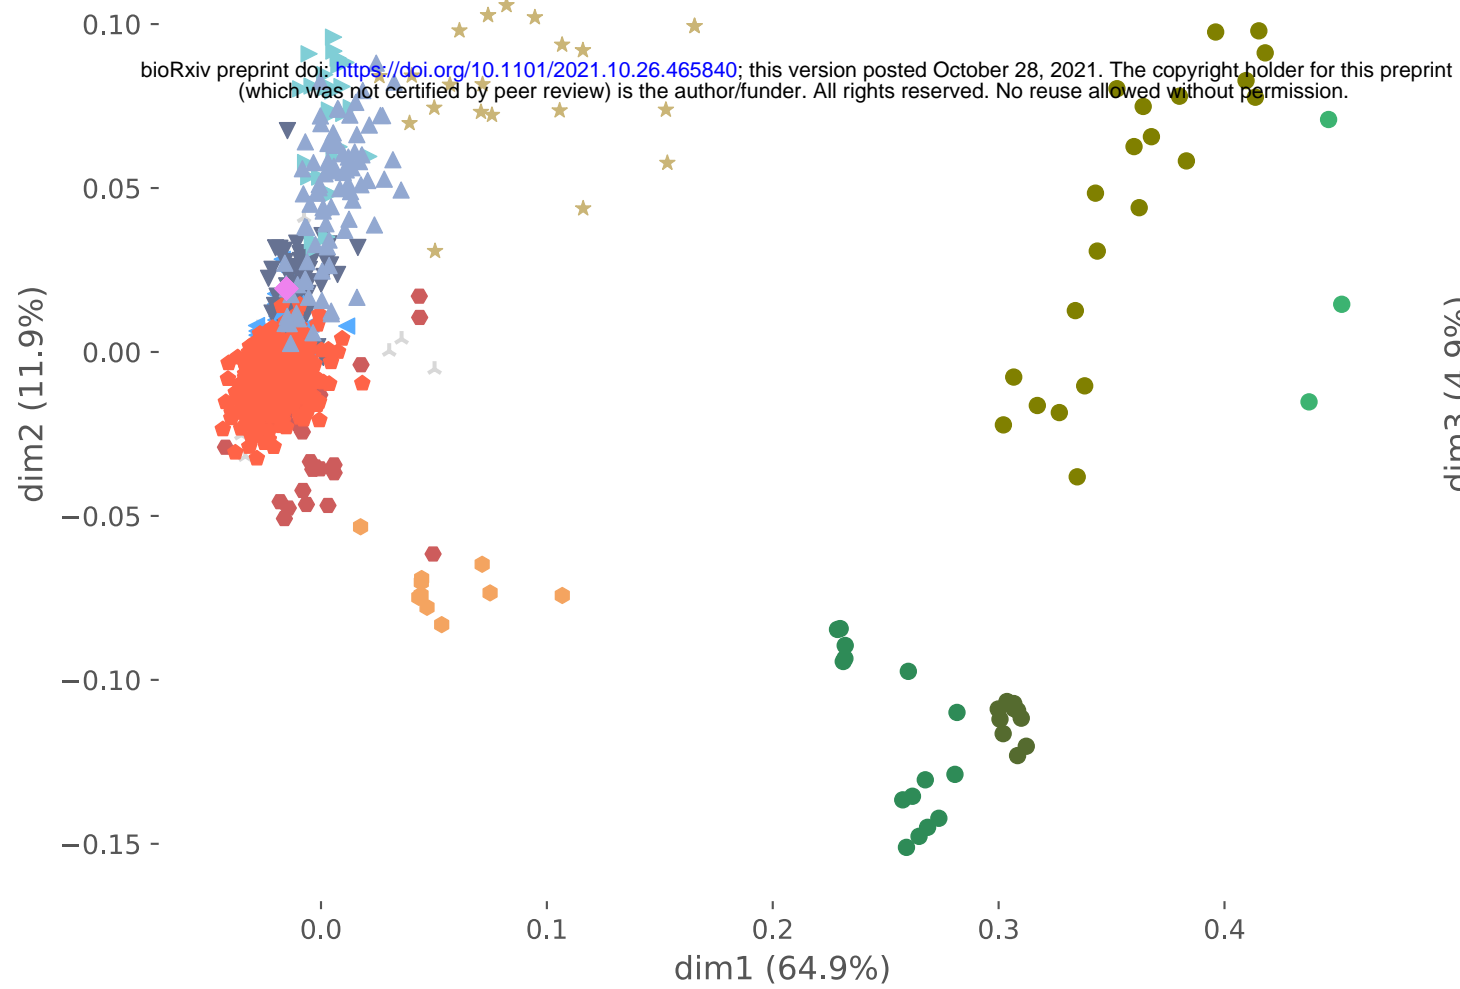**B**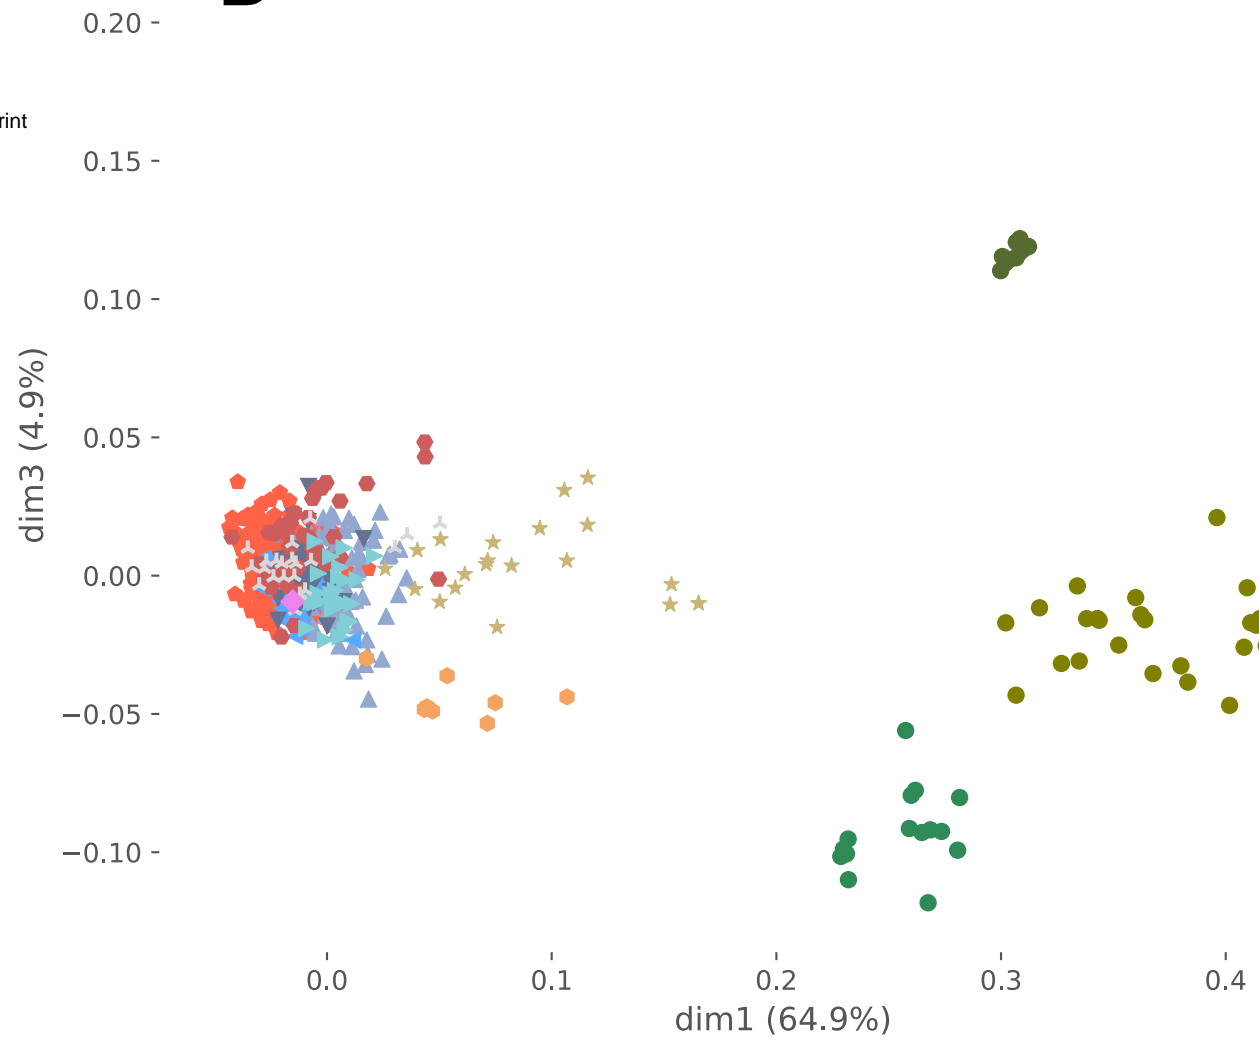**C**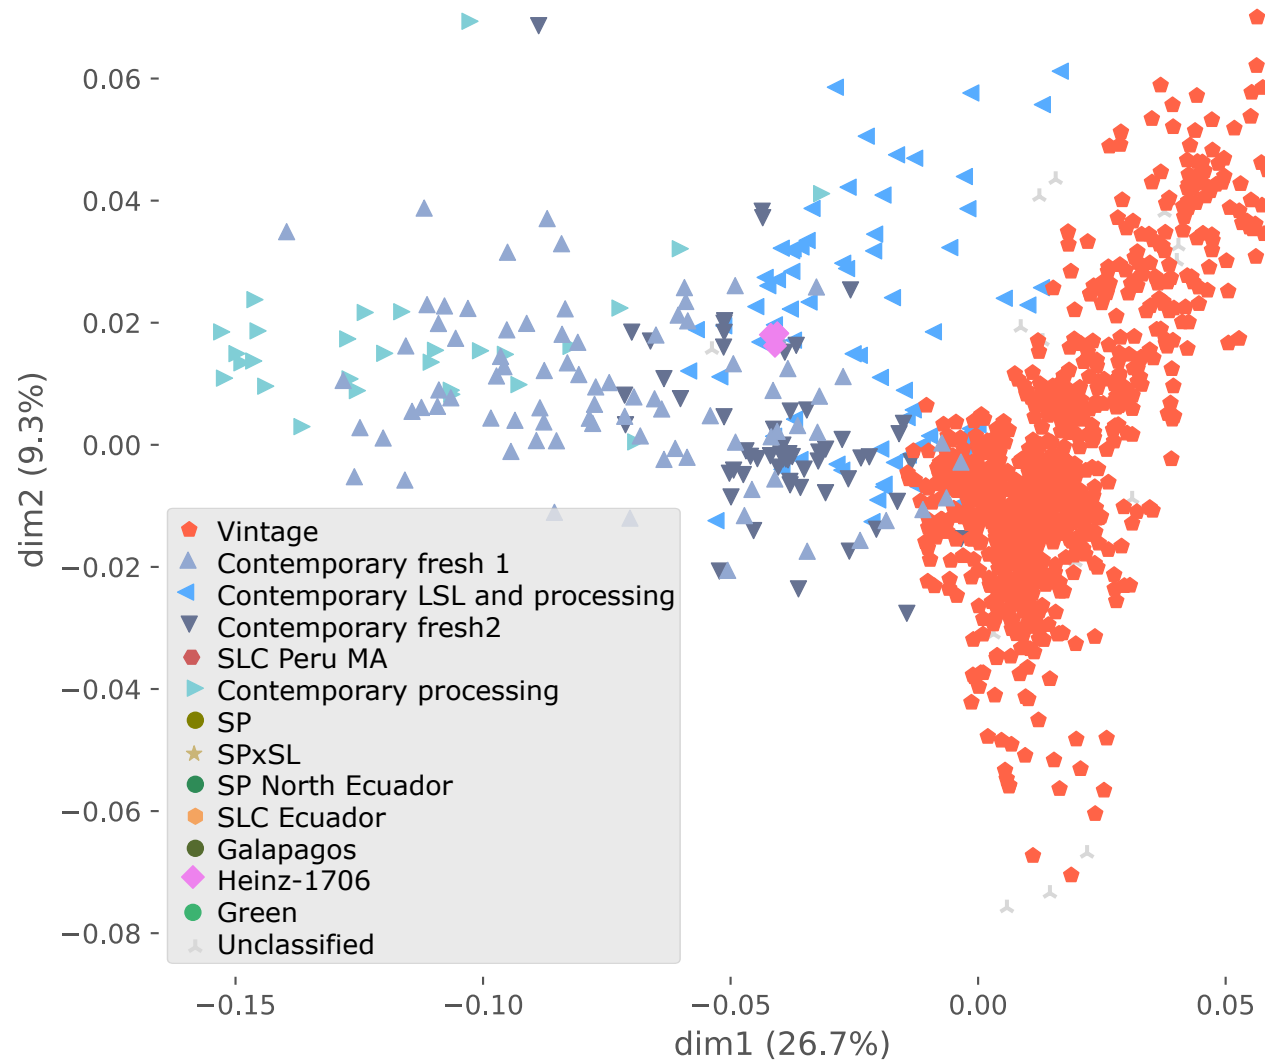**D**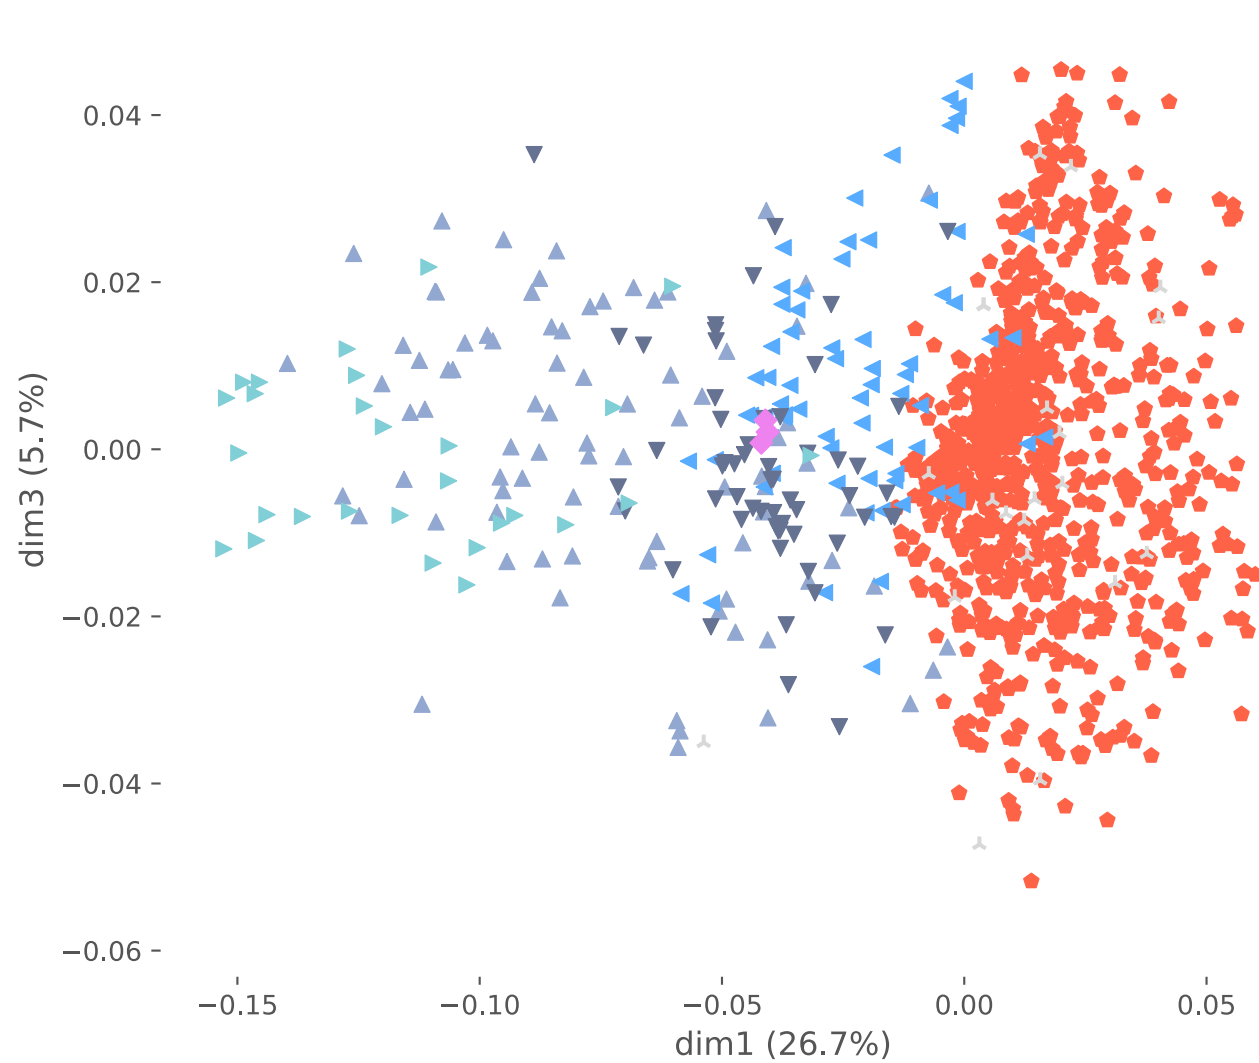

**A**

bioRxiv preprint doi: <https://doi.org/10.1101/2021.10.26.465840>; this version posted October 28, 2021. The copyright holder for this preprint (which was not certified by peer review) is the author/funder. All rights reserved. No reuse allowed without permission.

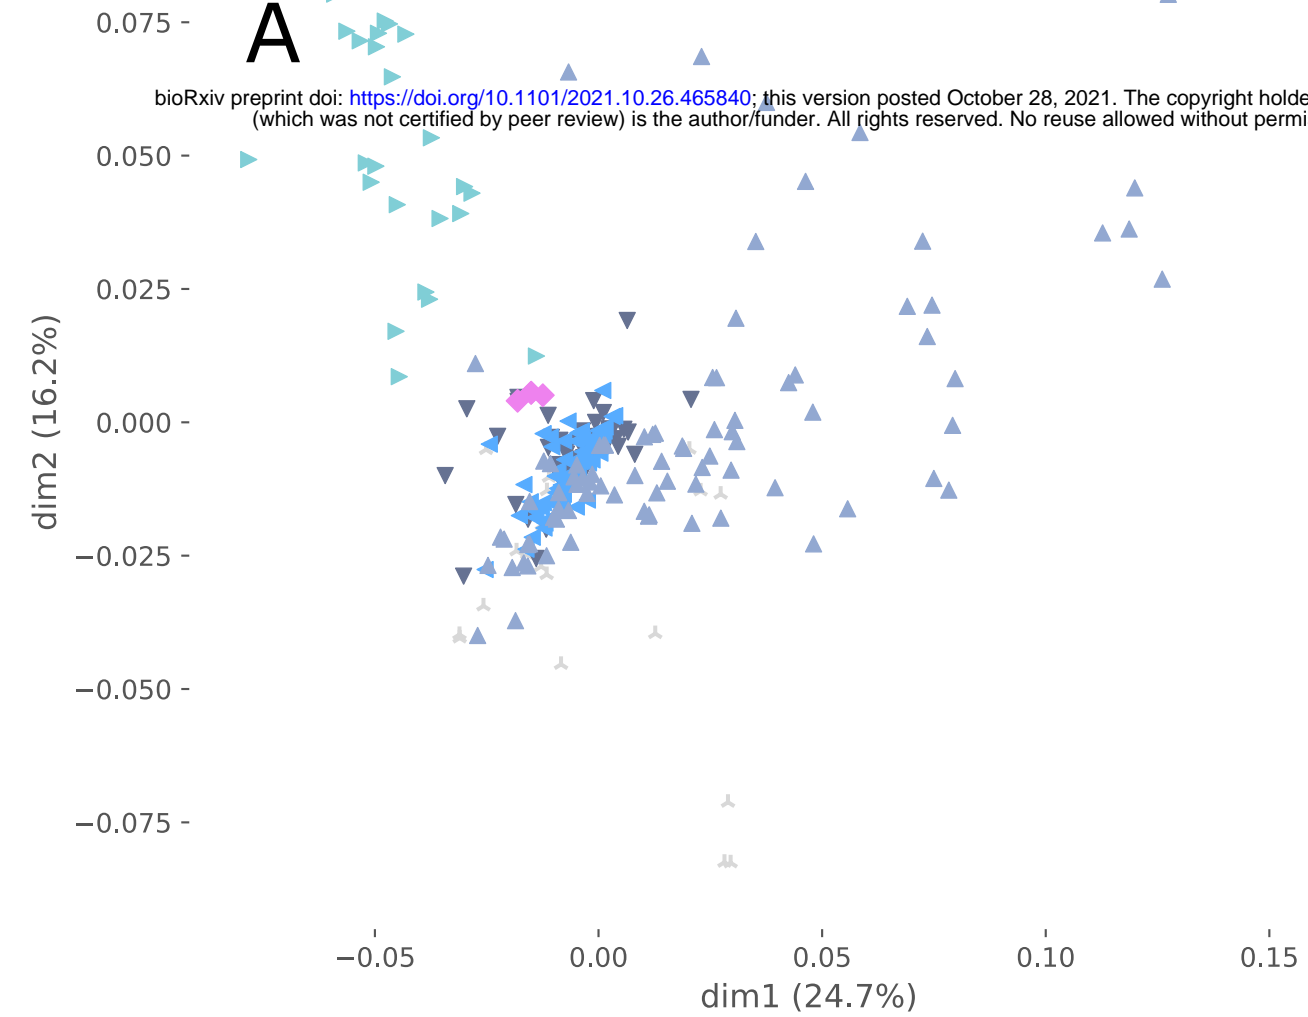**B**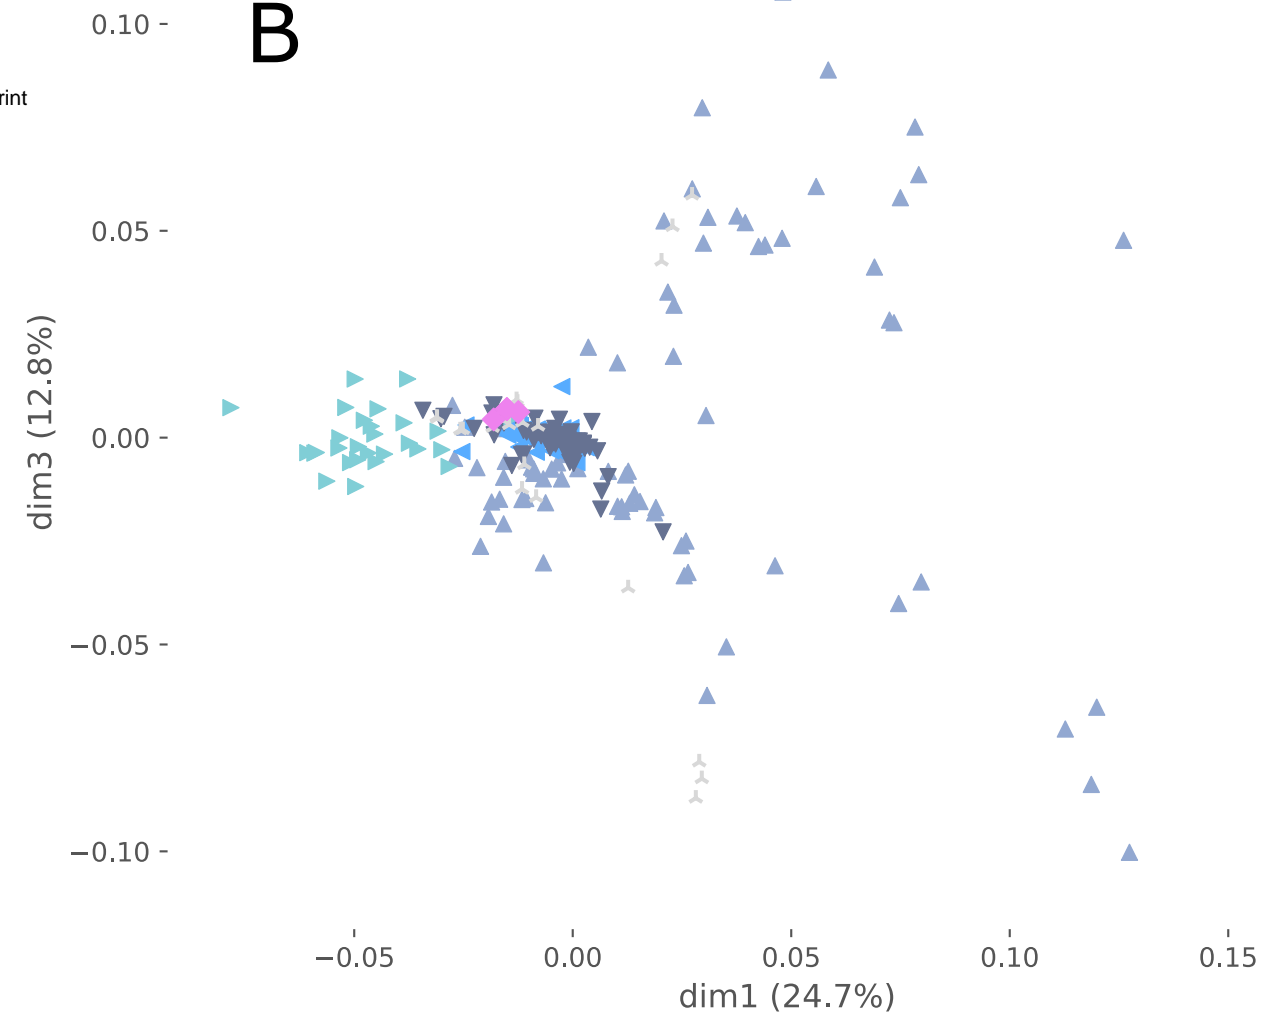**C**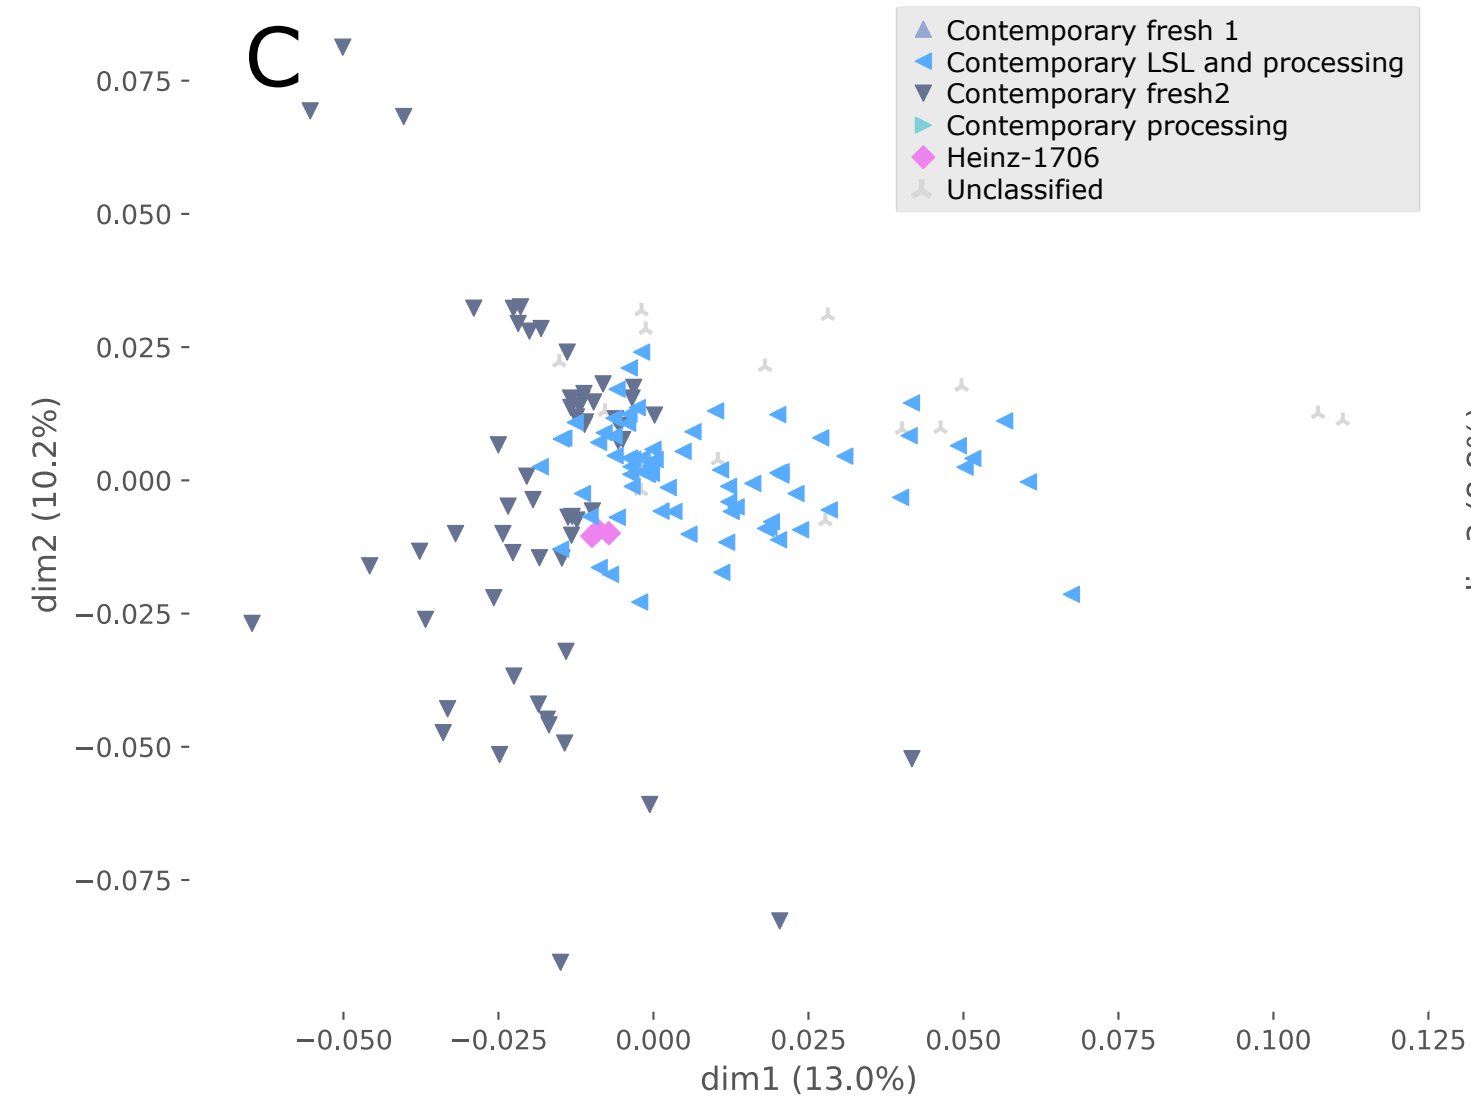**D**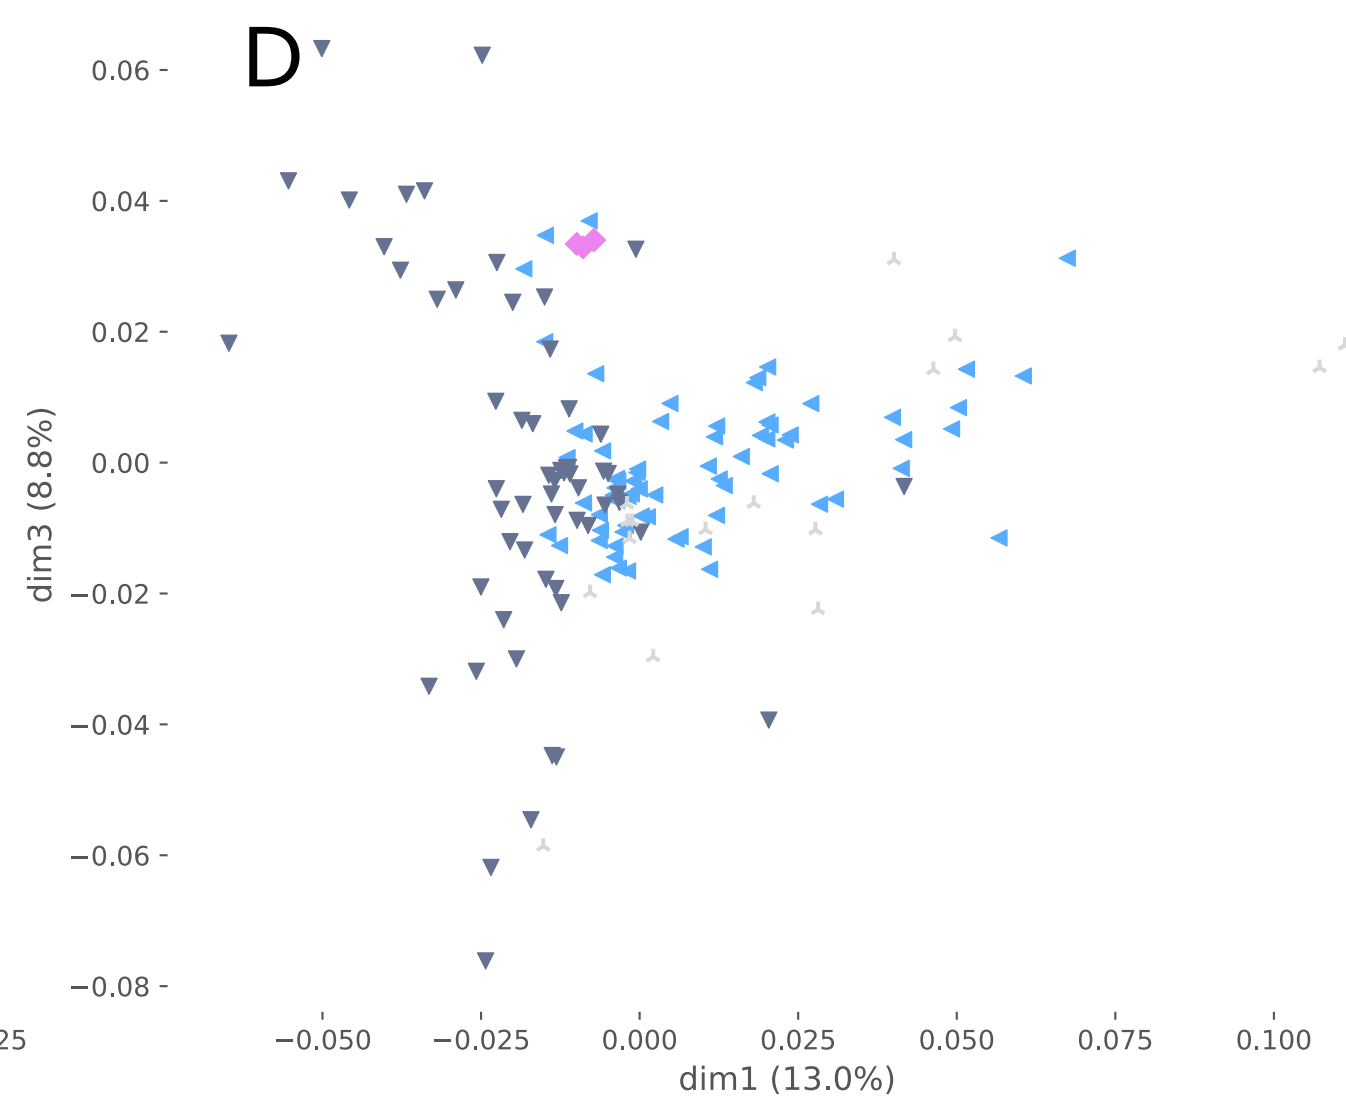

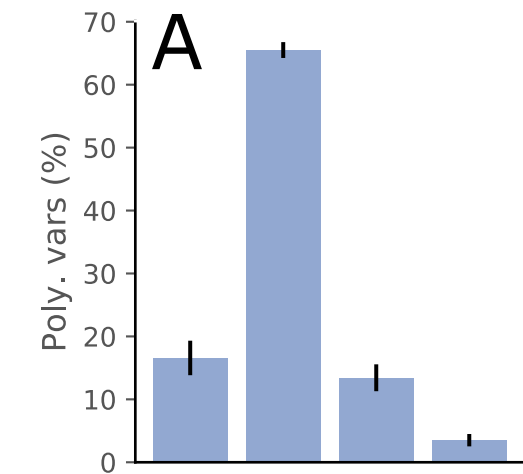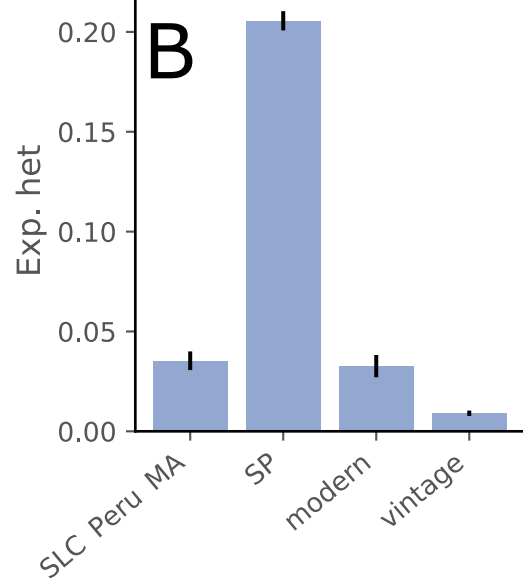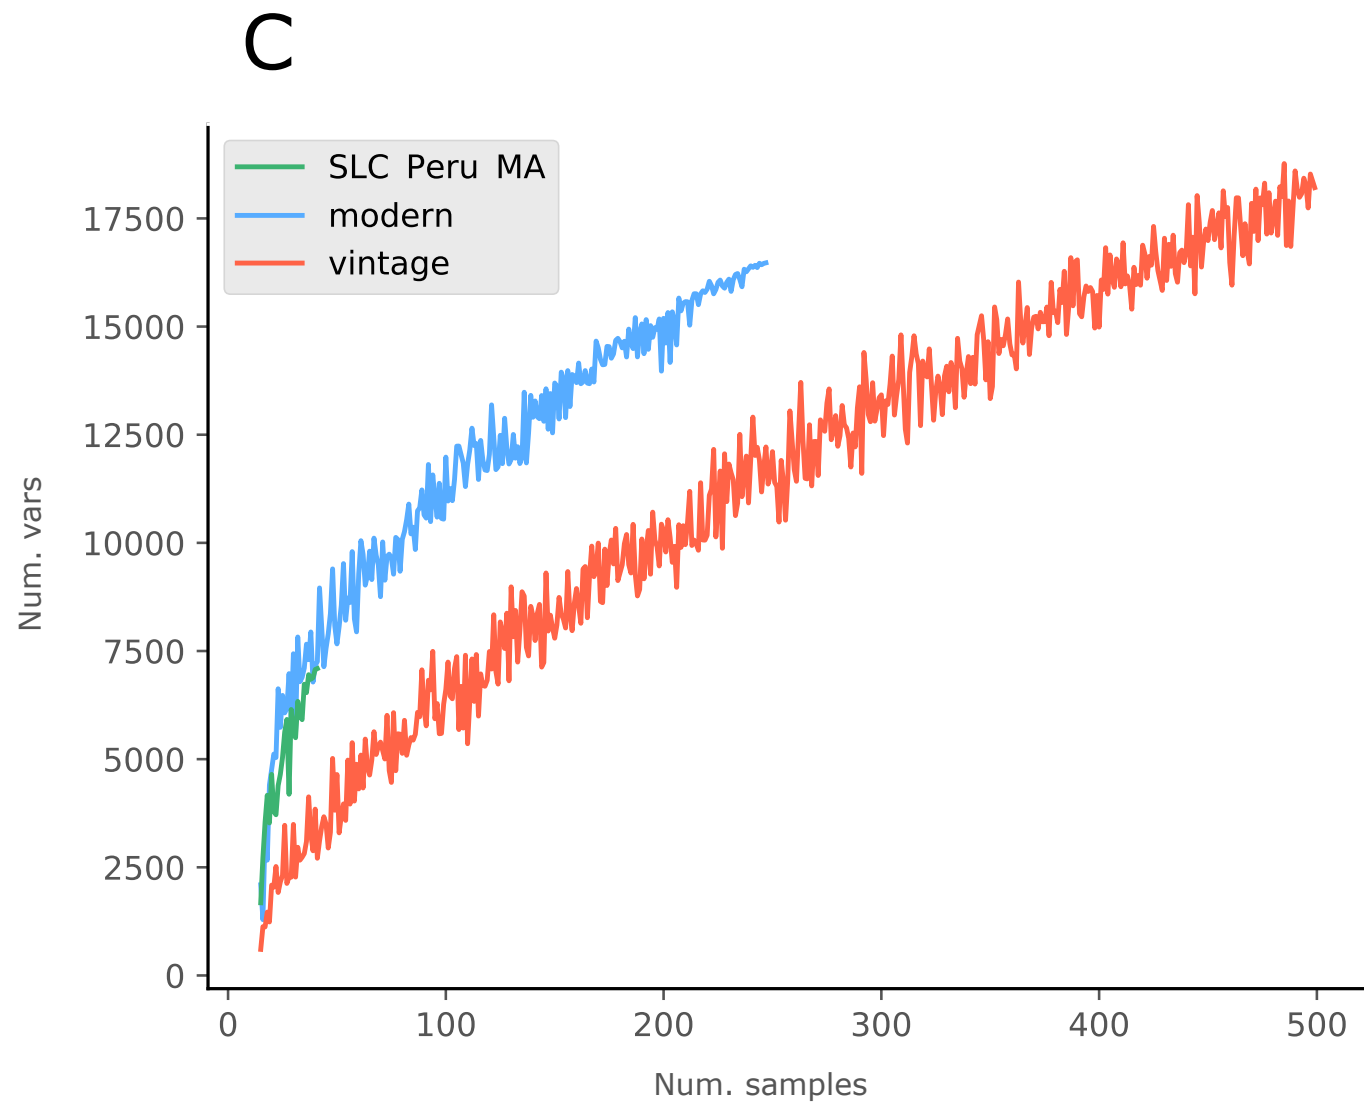

# A

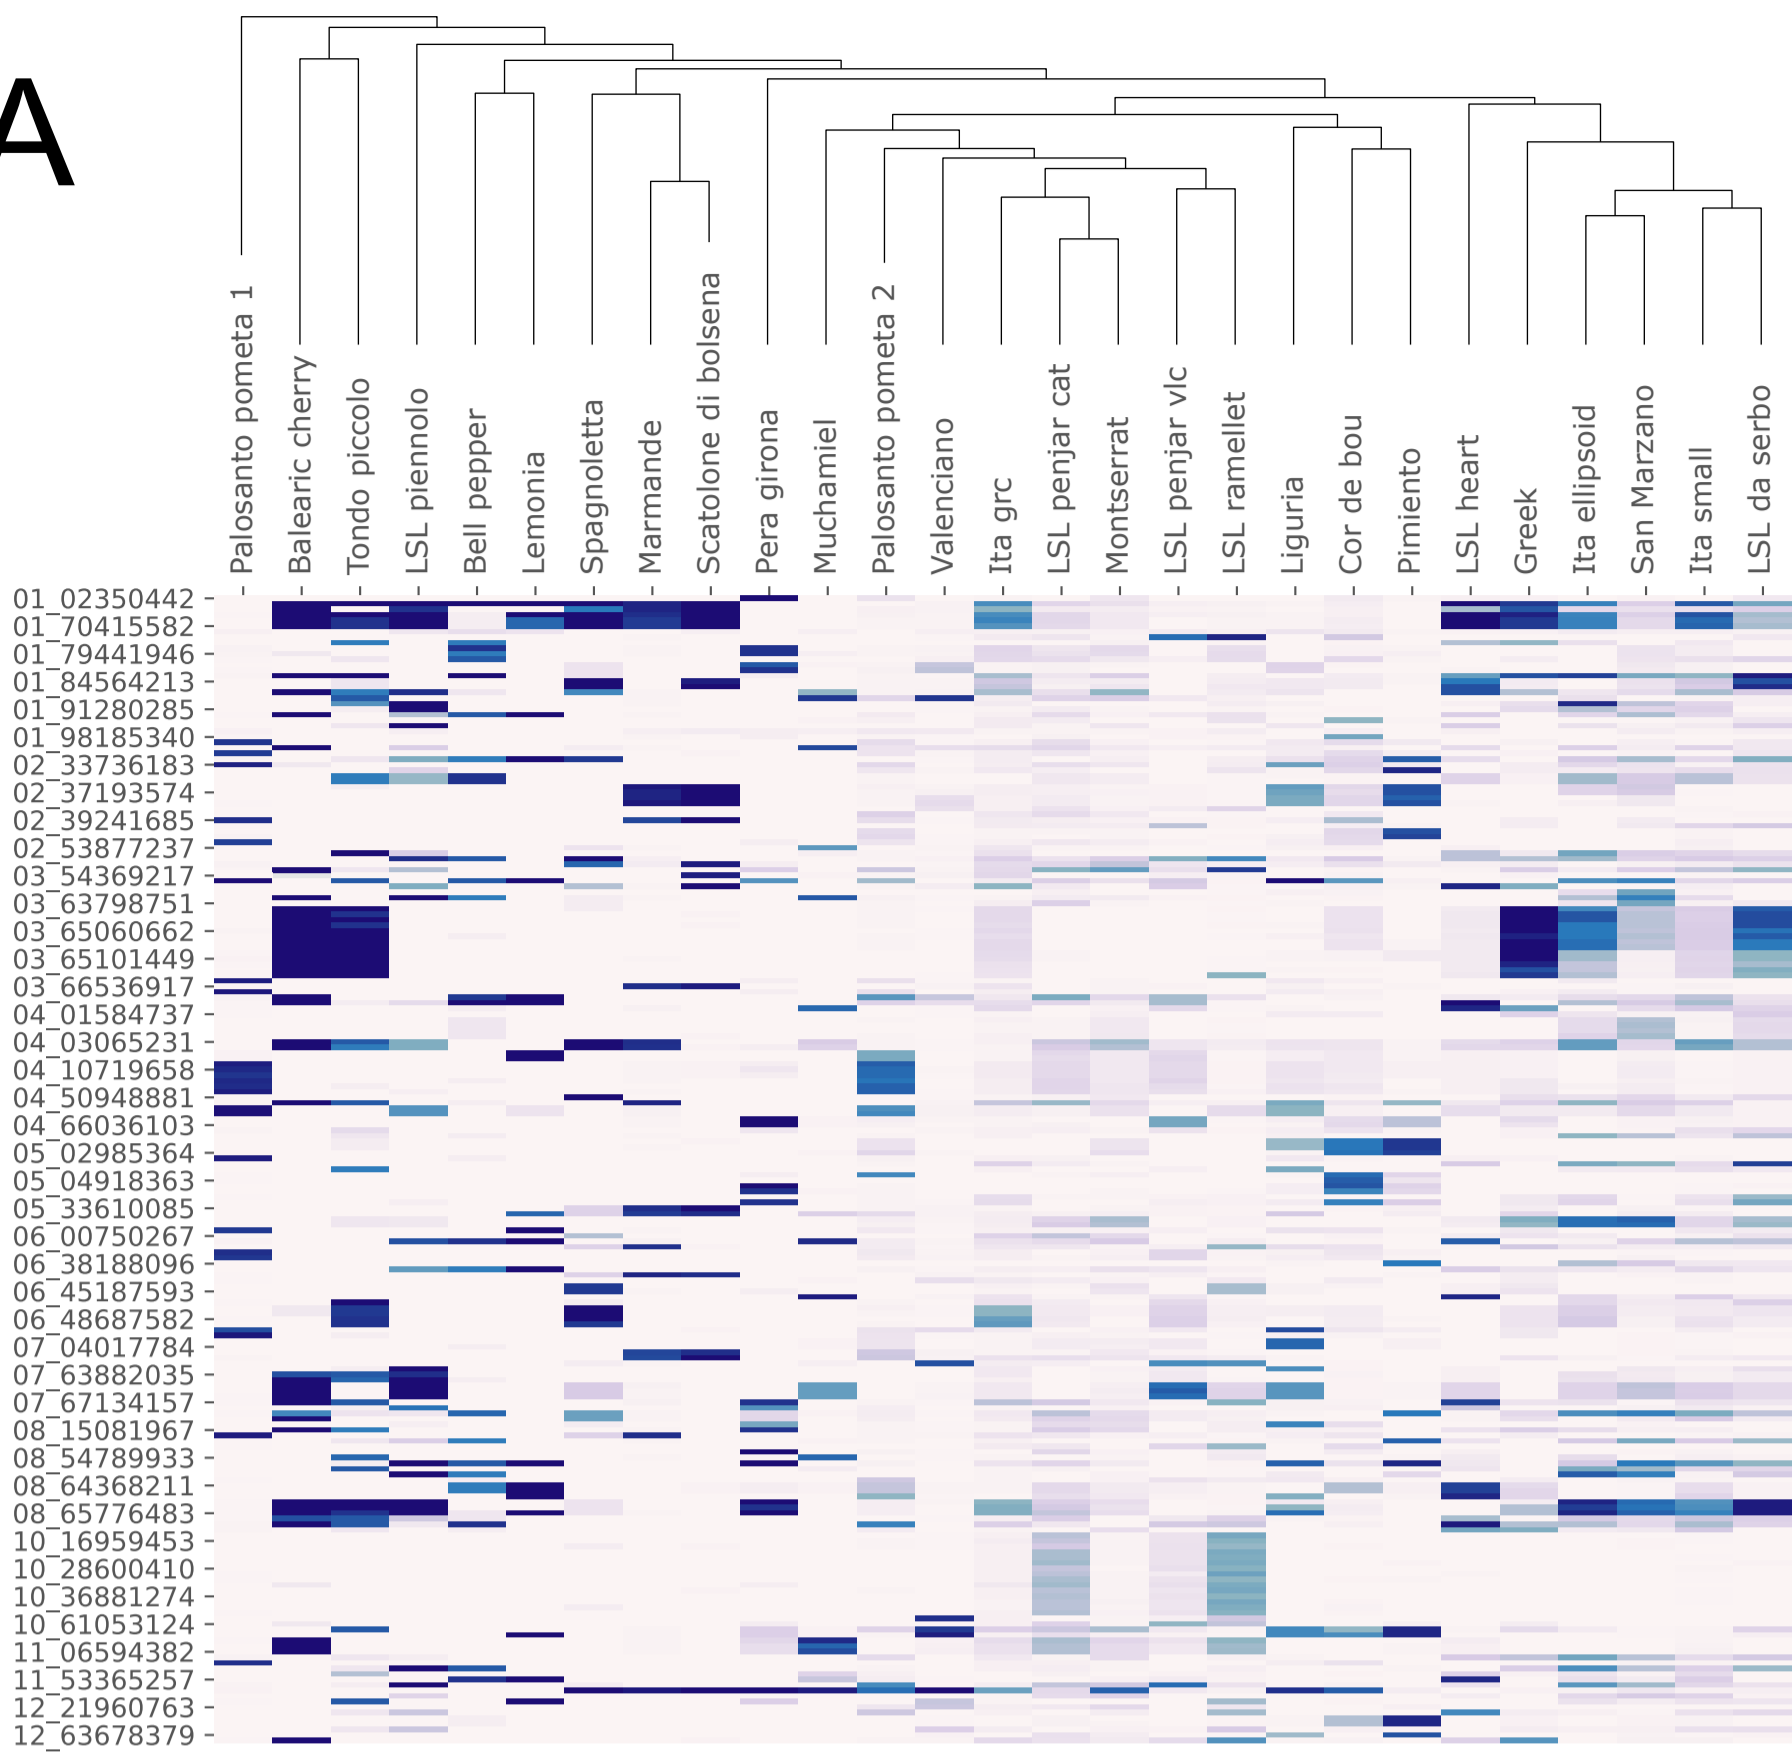

# C

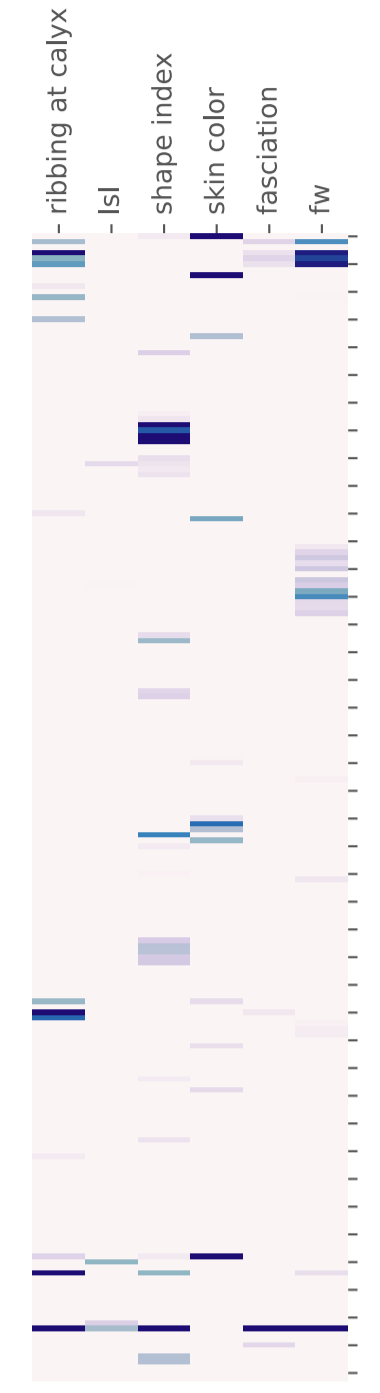

# B

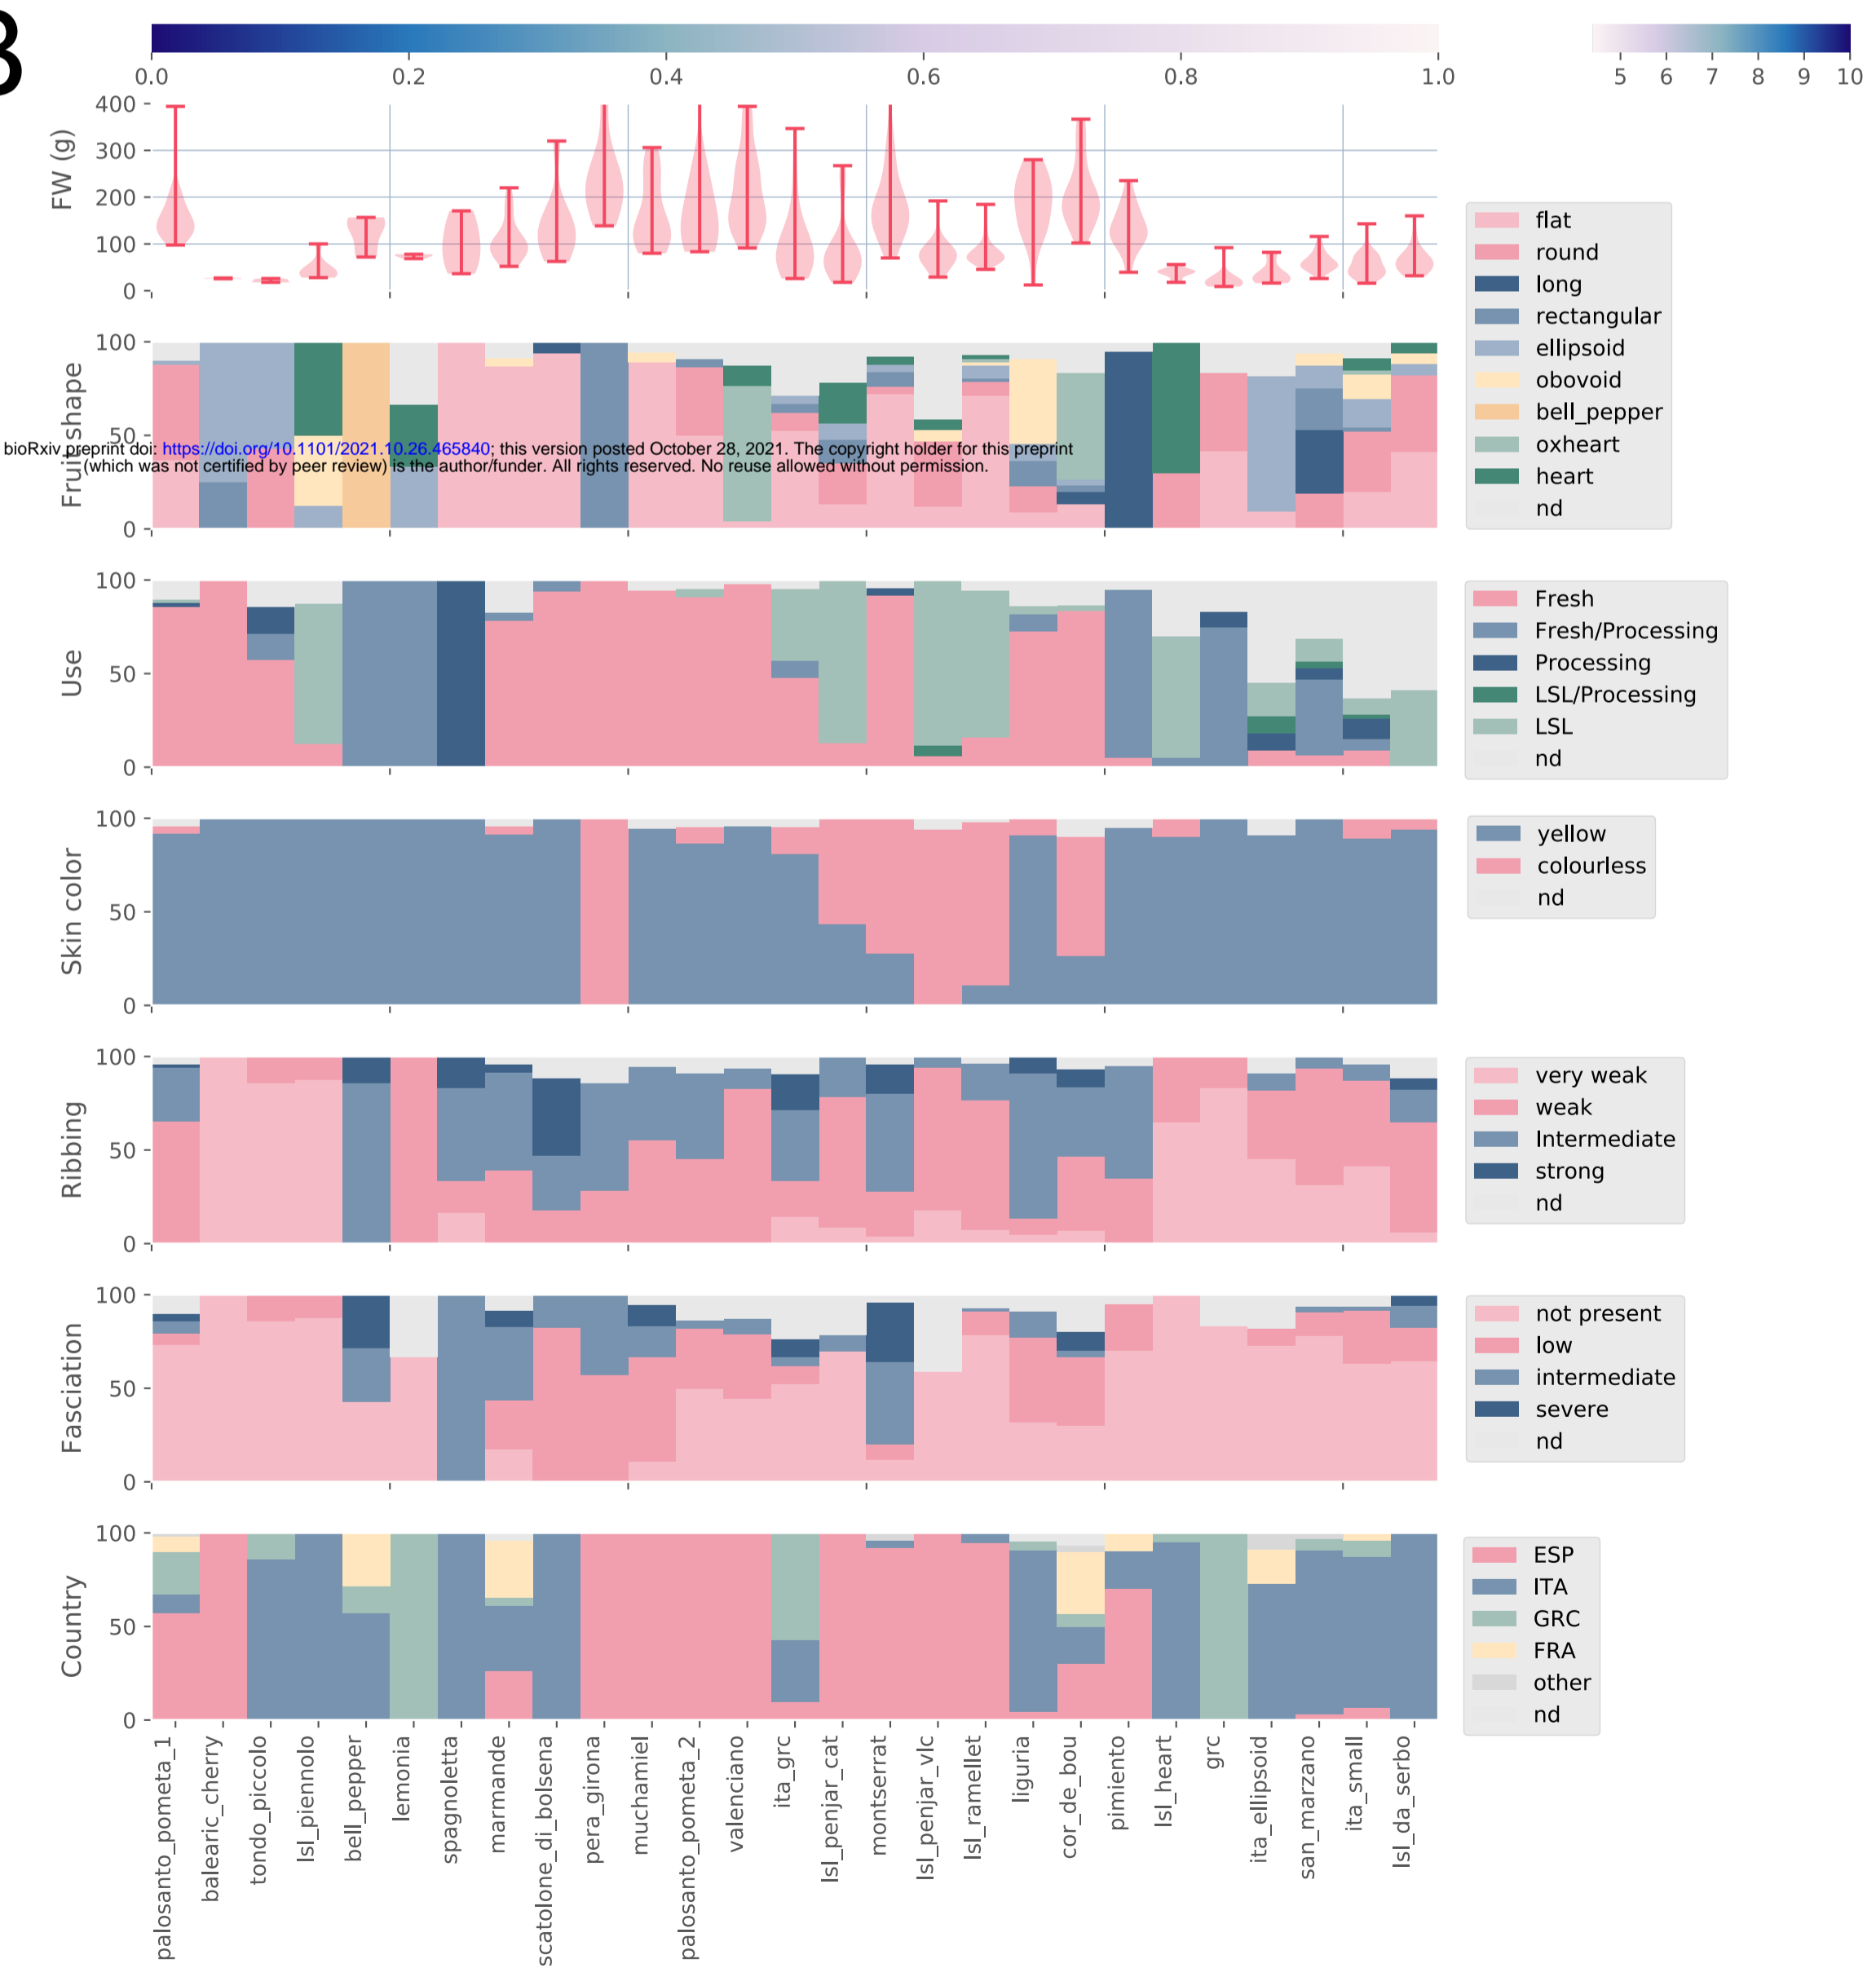

# A

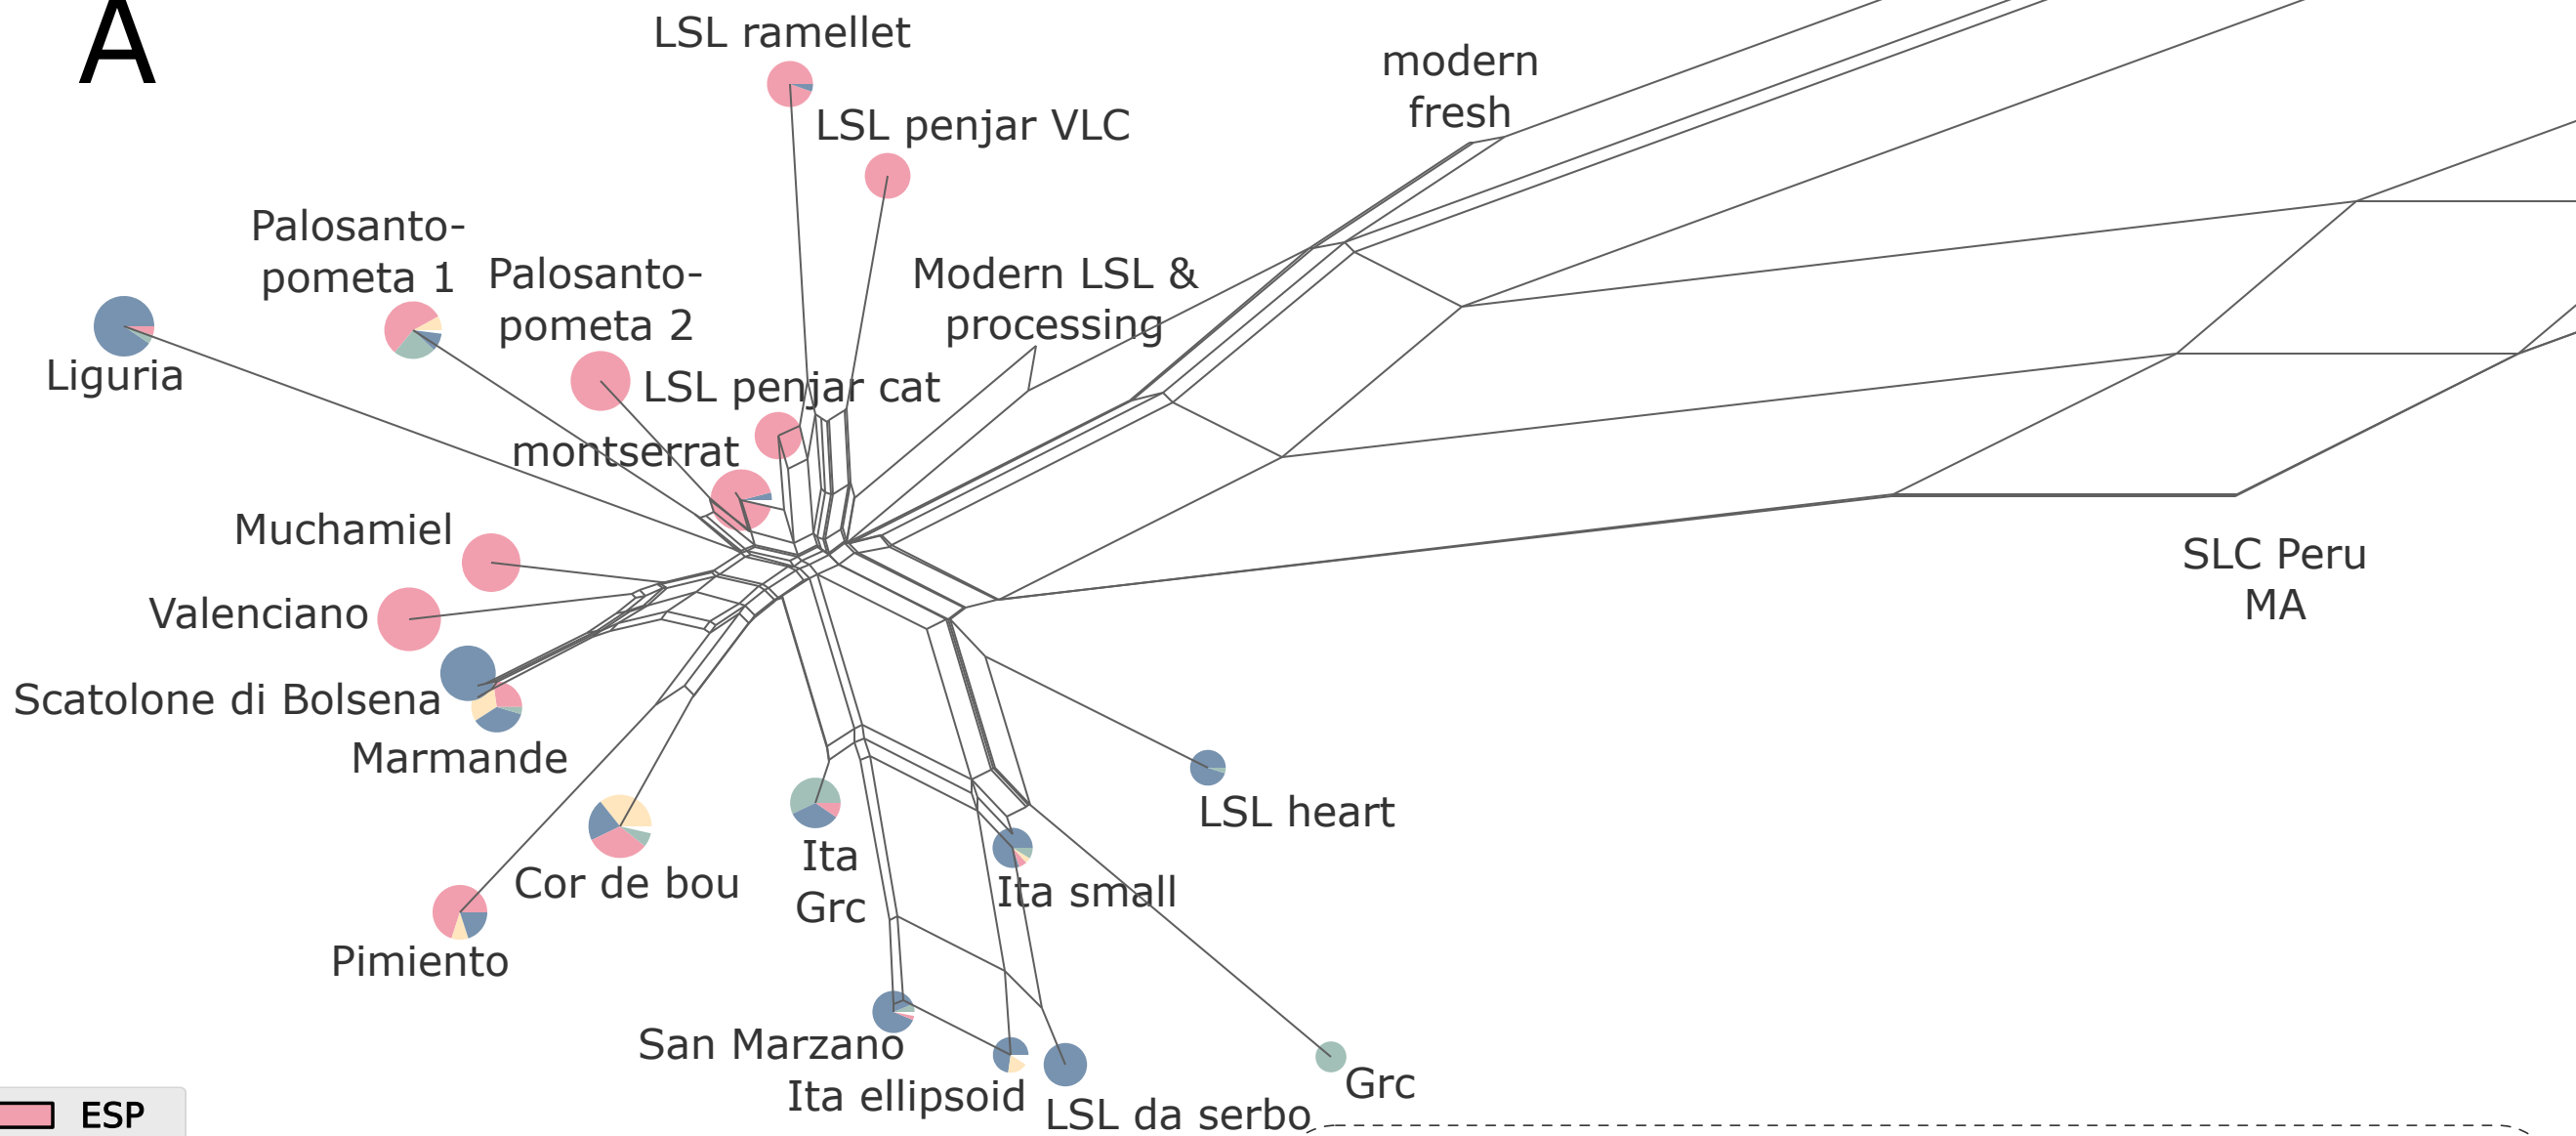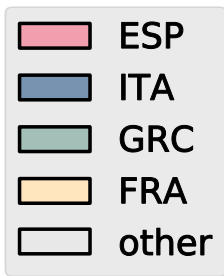

# B

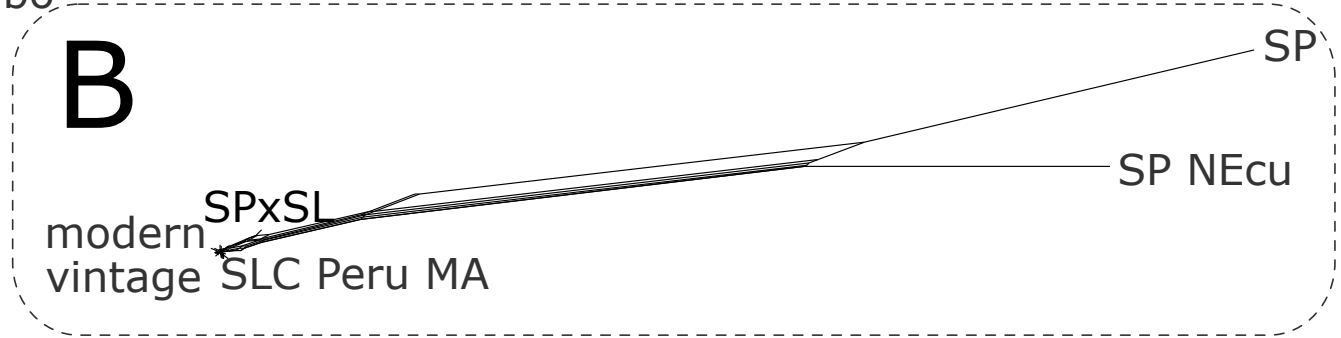

Source: https://www.biorxiv.org/content/biorxiv/early/2021/10/28/2021.10.26.465840.full.pdf
